# Supplementary material for: Bridging carbon footprint and urban livability differences in Chinese non-core cities: a typological exploration
Source: Research Square preprint supplement (doi:10.21203/rs.3.rs-3993809/v1), 2024-03-05
Supplement: Supplementary file 1 [file 61aea5138cad76455d95d39a.xlsx]

## Sheet: Sheet1
city_name	Agriculture	Service	Industrial	Household	Transport	Energy
Tangshan	0.000595194	0.00143219	0.512499	0.00658433	0.00613794	0.472751
Qinhuangdao	0.00138233	0.00460776	0.49856	0.0226932	0.015436	0.457321
Handan	0.00140603	0.00402281	0.500195	0.0115607	0.0144899	0.468325
Baoding	0.00668052	0.0141033	0.4663	0.0627969	0.0537411	0.396378
Zhangjiakou	0.00879899	0.00594218	0.472746	0.0127985	0.0197692	0.479945
Chengde	0.00327315	0.00306198	0.529617	0.0368493	0.0156266	0.411572
Cangzhou	0.00554963	0.00618997	0.419637	0.0375667	0.0310566	0.5
Langfang	0.00579345	0.0125945	0.386146	0.0670025	0.0534005	0.475063
Hengshui	0.0149912	0.0189594	0.354938	0.0379189	0.0731922	0.5
Datong	0.00550287	0.0135815	0.480623	0.00784451	0.0347734	0.457675
Changzhi	0.00430509	0.00609211	0.484932	0.00625457	0.0237999	0.474616
Jincheng	0.00398253	0.00539568	0.484327	0.0136177	0.0255653	0.467112
Jinzhong	0.00372549	0.0072549	0.466078	0.01	0.0303922	0.482549
Yuncheng	0.00596553	0.0077331	0.472529	0.00913242	0.0335837	0.471056
Xinzhou	0.0105377	0.00852317	0.444135	0.0237099	0.0392066	0.473888
Linfen	0.00513634	0.00521187	0.472921	0.0103482	0.0276456	0.478737
Lvliang	0.00341547	0.00420834	0.493657	0.00841669	0.019029	0.471273
Baotou	0.000916323	0.00853846	0.484568	0.00516473	0.00691407	0.493898
Wuhai	0.000107043	0.00342539	0.528581	0.00107043	0.00396061	0.462856
Chifeng	0.00801245	0.0145469	0.478257	0.00684559	0.0192143	0.473123
Tongliao	0.00593215	0.00686529	0.491635	0.00439912	0.0117976	0.479371
Ordos	0.000451457	0.00228104	0.500713	0.00223352	0.00337404	0.490947
Hulunbuir	0.00802909	0.00984699	0.466672	0.0161339	0.0115892	0.487729
Bayannur	0.0077634	0.016451	0.463031	0.00757856	0.0173752	0.4878
Ulanqab	0.00550786	0.00947675	0.501215	0.00704682	0.00826179	0.468492
Dalian	0.00356311	0.00753734	0.447855	0.0117171	0.0661916	0.463136
Anshan	0.00252863	0.00364421	0.47806	0.00505727	0.0283356	0.482374
Fushun	0.00302545	0.00569496	0.4588	0.0060509	0.0377291	0.488699
Benxi	0.00102326	0.00195349	0.50093	0.00595349	0.0141395	0.476
Dandong	0.00985222	0.00923645	0.412254	0.0147783	0.0778941	0.475985
Jinzhou	0.016835	0.010101	0.372615	0.0224467	0.0872615	0.490741
Yingkou	0.00147993	0.0026987	0.465222	0.0071385	0.0235048	0.499956
Fuxin	0.0196015	0.00642674	0.435411	0.00739075	0.0604113	0.470758
Liaoyang	0.00261243	0.00429185	0.556634	0.00727748	0.0341482	0.395036
Panjin	0.00619296	0.00586701	0.422425	0.0133638	0.0521512	0.5
Tieling	0.00929007	0.00346644	0.465613	0.00998336	0.0378536	0.473794
Chaoyang	0.00915364	0.00380228	0.446557	0.0218279	0.0464723	0.472187
Huludao	0.0066135	0.00505738	0.42482	0.0237308	0.0546586	0.48512
Jilin	0.00479543	0.0070401	0.470258	0.0111213	0.0294868	0.477298
Siping	0.00976709	0.00676183	0.462059	0.0172802	0.0272352	0.476897
Liaoyuan	0.00652938	0.00652938	0.489704	0.00652938	0.0396786	0.45103
Tonghua	0.00481983	0.00665596	0.469589	0.00229516	0.0245582	0.492082
Baishan	0.00482509	0.00904704	0.449337	0.00844391	0.0470446	0.481303
Songyuan	0.0265589	0.0107775	0.384911	0.00846805	0.0692841	0.5
Baicheng	0.0209838	0.00722394	0.421397	0.00756794	0.0426557	0.500172
Qiqihar	0.0350761	0.029914	0.400397	0.0116479	0.0254136	0.497551
Shuangyashan	0.0242338	0.0154431	0.452126	0.00522689	0.0133048	0.489665
Daqing	0.0124488	0.0208026	0.428174	0.0162162	0.0222768	0.500082
YichunHLJ	0.00945626	0.0173365	0.473601	0.00157604	0.0173365	0.480693
Jiamusi	0.0725689	0.0384615	0.350871	0.0101597	0.0406386	0.4873
Qitaihe	0.00465658	0.0056267	0.481568	0.00194024	0.00620877	0.5
Mudanjiang	0.0288387	0.0568979	0.373733	0.00974279	0.0444271	0.48636
Wuxi	0.00157788	0.000189346	0.473492	0.00586973	0.046516	0.472355
Xuzhou	0.00598802	0.000172731	0.484627	0.00282128	0.0468678	0.459523
Changzhou	0.00382077	0.000231562	0.548223	0.00891513	0.0563853	0.382424
SuzhouJS	0.00123995	0.000158967	0.456777	0.00451467	0.0393285	0.497981
Nantong	0.0111847	0.000217179	0.394831	0.00629819	0.0875231	0.499946
Lianyungang	0.00869914	0.000133833	0.427998	0.00548715	0.057682	0.5
Huai'an	0.0140318	0.000374181	0.399252	0.00767072	0.0785781	0.500094
Yancheng	0.0236254	0.000281254	0.393475	0.00492195	0.0895795	0.488117
Yangzhou	0.00686416	0.000240848	0.435212	0.00337187	0.0543112	0.5
Zhenjiang	0.00297785	9.30579e-05	0.512842	0.00251256	0.0292202	0.452354
TaizhouJS	0.00736624	0.000258465	0.43099	0.00245541	0.05893	0.5
Suqian	0.028743	0.000858001	0.267267	0.013299	0.189618	0.500215
Wenzhou	0.00918221	0.010043	0.360402	0.0126255	0.107747	0.5
Jiaxing	0.0107286	0.00400849	0.43834	0.00754539	0.0418533	0.497524
Huzhou	0.0155703	0.00349895	0.538139	0.0069979	0.0376137	0.398181
Shaoxing	0.0132008	0.0053781	0.415743	0.0203716	0.053781	0.491525
Jinhua	0.0197355	0.00789422	0.427472	0.0134202	0.0884152	0.443063
Quzhou	0.0107662	0.00215324	0.534542	0.00358873	0.0263772	0.422573
Zhoushan	0.00237092	0.00184405	0.353267	0.0044784	0.13804	0.5
TaizhouZJ	0.0117268	0.00469071	0.397977	0.00894166	0.0766637	0.5
Lishui	0.047619	0.0113379	0.232426	0.0306122	0.178005	0.5
Wuhu	0.0012109	0.00161453	0.579818	0.00544904	0.0235116	0.388396
Bengbu	0.00953029	0.00408441	0.415248	0.0411845	0.0513955	0.478557
Huainan	0.000852838	0.0014214	0.486971	0.00625415	0.0117502	0.492751
Ma'anshan	0.000518224	0.00103645	0.514769	0.0035412	0.0120919	0.468043
Huaibei	0.00210711	0.00158033	0.501844	0.00667252	0.0143986	0.473398
Tongling	0.000403551	0.000134517	0.635593	0.00242131	0.0141243	0.347323
Anqing	0.00898411	0.00322506	0.47132	0.00921447	0.0744068	0.43285
Huangshan	0.0235294	0.0235294	0.101961	0.137255	0.215686	0.498039
Chuzhou	0.0152735	0.00444321	0.565399	0.0141627	0.0441544	0.356568
Fuyang	0.0175063	0.0096463	0.307967	0.043587	0.121472	0.499821
SuzhouJX	0.0136311	0.00464037	0.459107	0.0208817	0.0582947	0.443445
Lu'an	0.0363392	0.00807537	0.294751	0.0457604	0.115074	0.5
Bozhou	0.0208644	0.00894188	0.344262	0.0327869	0.0933929	0.499752
Chizhou	0.00356612	0.00118871	0.637741	0.00445765	0.0377415	0.315305
Xuancheng	0.00634249	0.00271821	0.650861	0.00815464	0.0286922	0.303232
Putian	0.0053205	0.000506714	0.415759	0.00608057	0.0722067	0.500127
Sanming	0.00622972	0.000389358	0.56989	0.00259572	0.0220636	0.398832
Quanzhou	0.00389864	0.00132908	0.448432	0.00407585	0.0581251	0.48414
Zhangzhou	0.00556036	0.000864945	0.436303	0.00284196	0.0544915	0.499938
Nanping	0.0456882	0.0011422	0.386636	0.00913764	0.0919475	0.465448
Longyan	0.00547289	0.000855139	0.646314	0.00290747	0.0275355	0.316915
Ningde	0.00756646	0.000817996	0.421063	0.00531697	0.0652352	0.5
Jingdezhen	0.00224719	0.00421348	0.416292	0.0705056	0.0275281	0.479213
Pingxiang	0.00160858	0.00214477	0.515818	0.00857909	0.0273458	0.444504
Xinyu	0.00140987	0.00261833	0.495065	0.00805639	0.0138973	0.478953
Yingtan	0.00462428	0.00404624	0.446243	0.00693642	0.0381503	0.5
Ganzhou	0.00871599	0.0121173	0.472577	0.0216837	0.109906	0.375
Ji'an	0.0159259	0.00777778	0.411852	0.0133333	0.0940741	0.457037
YichunJX	0.00634968	0.00413467	0.463822	0.021707	0.0428234	0.461164
FuzhouJX	0.0110203	0.00959829	0.418415	0.00995379	0.0728759	0.478137
Shangrao	0.00973409	0.00807217	0.50736	0.014245	0.0887939	0.371795
Zibo	0.0011609	0.00642365	0.526043	0.00611408	0.0216701	0.438588
Zaozhuang	0.00118856	0.0054334	0.573308	0.00415995	0.0198659	0.396044
Dongying	0.00414547	0.00697192	0.45261	0.00753721	0.0286414	0.500094
Yantai	0.00300752	0.00767709	0.479858	0.0148793	0.0400475	0.454531
Weifang	0.0033466	0.00813571	0.480353	0.00802031	0.0324851	0.467659
Jining	0.0028169	0.00765619	0.473528	0.00736728	0.0371975	0.471434
Tai'an	0.00318697	0.00944287	0.48796	0.016289	0.0383617	0.444759
Weihai	0.00506667	0.0117333	0.413333	0.0154667	0.0544	0.5
Rizhao	0.00177553	0.00345762	0.49715	0.0106532	0.0186898	0.468274
Linyi	0.00420777	0.01014	0.490446	0.010071	0.0464234	0.438711
Dezhou	0.00503266	0.0077096	0.451333	0.00738837	0.0356569	0.492879
Liaocheng	0.00263273	0.00526547	0.464751	0.00424163	0.0257423	0.497367
Binzhou	0.00128851	0.00183515	0.485729	0.00269415	0.00925384	0.4992
Heze	0.00623277	0.00946902	0.410883	0.0115067	0.0622078	0.4997
Kaifeng	0.0151515	0.0102375	0.362817	0.015561	0.0982801	0.497952
Luoyang	0.0052432	0.00535475	0.480477	0.00948237	0.0399375	0.459505
Pingdingshan	0.00462903	0.00385753	0.465732	0.0185161	0.0321461	0.475119
Anyang	0.00326188	0.0028891	0.492637	0.00503262	0.0255359	0.470643
Hebi	0.00347222	0.00315657	0.485795	0.0255682	0.0249369	0.457071
Xinxiang	0.00571351	0.00462522	0.528636	0.00598558	0.0425792	0.412461
Jiaozuo	0.00333272	0.00425847	0.496575	0.0120348	0.0325866	0.451213
Puyang	0.0116279	0.00872093	0.357074	0.0314922	0.0910853	0.5
Xuchang	0.00697906	0.00672981	0.484546	0.0214357	0.0548355	0.425474
Luohe	0.0138768	0.0156114	0.336513	0.0303556	0.103209	0.500434
Sanmenxia	0.00543971	0.00385313	0.509746	0.00294651	0.0237987	0.454216
Nanyang	0.0188614	0.0103824	0.42118	0.0401454	0.0846167	0.424814
Shangqiu	0.0158212	0.0102963	0.36213	0.0143144	0.0981919	0.499247
Xinyang	0.0233524	0.0103788	0.41178	0.0150493	0.0967826	0.442657
Zhoukou	0.0319245	0.0188849	0.183453	0.0409173	0.22482	0.5
Zhumadian	0.0250831	0.0120882	0.373527	0.0341493	0.105772	0.44938
Huangshi	0.00314564	0.00912237	0.555992	0.0152564	0.0220195	0.394464
Shiyan	0.0195016	0.0346696	0.454496	0.0541712	0.00433369	0.432828
Xiangyang	0.022018	0.029286	0.424754	0.0224455	0.0615648	0.439932
Ezhou	0.00204313	0.00635641	0.485812	0.00749149	0.0145289	0.483768
Jingmen	0.0176913	0.0168067	0.499779	0.0256524	0.0307386	0.409332
Xiaogan	0.0171336	0.023385	0.38921	0.0201436	0.0525585	0.497569
Jingzhou	0.0359779	0.0424354	0.310886	0.048278	0.097171	0.465252
Huanggang	0.0272642	0.0363522	0.355374	0.0460671	0.107176	0.427766
Xianning	0.00790988	0.0151007	0.455177	0.027325	0.0357143	0.458773
Suizhou	0.0517464	0.0569211	0.134541	0.116429	0.141009	0.499353
Zhuzhou	0.0190449	0.0471859	0.418135	0.0264355	0.0346788	0.45452
Xiangtan	0.00539261	0.0152571	0.483099	0.00539261	0.0113113	0.479548
Hengyang	0.0304536	0.0727862	0.340389	0.037797	0.0460043	0.47257
Shaoyang	0.0422002	0.056752	0.381839	0.0253201	0.0590803	0.434808
Yueyang	0.0230179	0.0323956	0.402046	0.0238704	0.0300085	0.488662
Changde	0.0366991	0.0362936	0.432482	0.0306164	0.0338605	0.430049
Zhangjiajie	0.0841924	0.0584192	0.295533	0.0584192	0.0927835	0.410653
Yiyang	0.0348326	0.041258	0.403449	0.0253635	0.0405817	0.454515
Chenzhou	0.0224539	0.0438385	0.42796	0.0352847	0.0384924	0.43197
Yongzhou	0.054437	0.0700969	0.434377	0.0126771	0.0607755	0.367636
Huaihua	0.0664011	0.0498008	0.317397	0.0385126	0.0969456	0.430943
Loudi	0.00677048	0.014218	0.494245	0.00957539	0.0114131	0.463778
Shaoguan	0.00668717	0.00173867	0.49231	0.00682092	0.0189916	0.473452
Zhuhai	0.00167946	0.00239923	0.400192	0.00815739	0.087572	0.5
Shantou	0.00238095	0.00496032	0.415873	0.0136905	0.0630952	0.5
Foshan	0.00302572	0.0075643	0.397579	0.022239	0.0742814	0.49531
Jiangmen	0.00746522	0.00373261	0.43417	0.0110282	0.0510689	0.492535
Zhanjiang	0.0110082	0.00348774	0.439346	0.0106812	0.0451226	0.490354
Maoming	0.0186199	0.00693684	0.334064	0.0317634	0.119022	0.489595
Zhaoqing	0.00698622	0.00310499	0.539297	0.0112556	0.0424995	0.396856
Huizhou	0.00697712	0.00324517	0.489697	0.0154146	0.0579263	0.42674
Meizhou	0.00834582	0.00363792	0.514445	0.0201156	0.0413011	0.412155
Shanwei	0.00656325	0.00328162	0.430489	0.0110382	0.0486277	0.5
Heyuan	0.0187085	0.0078455	0.406759	0.030175	0.0838865	0.452625
Yangjiang	0.00723221	0.00293198	0.501368	0.00703675	0.0324472	0.448984
Qingyuan	0.0104942	0.00253893	0.608497	0.00998646	0.0350372	0.333446
Dongguan	0.000525652	0.00746426	0.417368	0.0151388	0.0595038	0.5
Zhongshan	0.00233766	0.00545455	0.404675	0.0257143	0.0618182	0.5
Chaozhou	0.00415397	0.00249238	0.448629	0.00941567	0.0351703	0.500138
Jieyang	0.00813648	0.00603675	0.374278	0.0288714	0.0826772	0.5
Yunfu	0.00782382	0.00231817	0.565343	0.0133295	0.0353521	0.375833
Liuzhou	0.00231167	0.000679902	0.49932	0.00285559	0.0194452	0.475388
Wuzhou	0.0106383	0.00265957	0.277926	0.0691489	0.158245	0.481383
Beihai	0.00420364	0.000934143	0.450724	0.0098085	0.0630546	0.471275
Fangchenggang	0.000949487	0.000189897	0.511394	0.000379795	0.0119635	0.475123
Qinzhou	0.00558971	0.000558971	0.454444	0.0039128	0.0354947	0.5
Guigang	0.00523231	0.000418585	0.605274	0.00606949	0.0359983	0.347007
YulinGX	0.00778388	0.0018315	0.544872	0.0123626	0.0815018	0.351648
Baise	0.00390508	0.000450586	0.526885	0.00120156	0.0169721	0.450586
Hezhou	0.00576822	0.000524384	0.492921	0.00209754	0.0325118	0.466177
Hechi	0.0191781	0.00182648	0.525114	0.00639269	0.0968037	0.350685
Laibin	0.0120948	0.000483793	0.484761	0.00338655	0.0343493	0.464925
Chongzuo	0.0140845	0.000586854	0.661972	0.00293427	0.0381455	0.282277
Haikou	0.0127168	0	0.104046	0.016185	0.36763	0.499422
Sanya	0.00511945	0	0.00682594	0.0170648	0.47099	0.5
Danzhou	0.0244989	0	0.374165	0.00445434	0.120267	0.476615
Luzhou	0.0117555	0.0101881	0.39185	0.0180251	0.101489	0.466693
Deyang	0.0117866	0.0210918	0.436725	0.0167494	0.114764	0.398883
Mianyang	0.013245	0.0160335	0.437783	0.0289299	0.0979435	0.406065
Guangyuan	0.0176879	0.0120025	0.521162	0.0176879	0.0821226	0.349337
Suining	0.0247396	0.03125	0.210938	0.0377604	0.195312	0.5
Neijiang	0.00482094	0.00734619	0.465335	0.0284665	0.0385675	0.455464
Leshan	0.00460914	0.00497788	0.578171	0.00995575	0.0313422	0.370944
Nanchong	0.034407	0.0417277	0.139092	0.0629575	0.221816	0.5
Meishan	0.011851	0.013544	0.384312	0.0327314	0.0886005	0.468962
Yibin	0.00923411	0.00923411	0.473384	0.0135796	0.0727865	0.421782
Ya'an	0.00946372	0.0105152	0.44164	0.0694006	0.0799159	0.389064
Bazhong	0.024565	0.0174002	0.362334	0.0522006	0.150461	0.39304
Ziyang	0.0481203	0.0285714	0.221053	0.0285714	0.184962	0.488722
Liupanshui	0.00262143	0.0210486	0.473169	0.0125675	0.0104086	0.480185
Zunyi	0.0165472	0.0886652	0.372725	0.0395753	0.0442637	0.438224
Anshun	0.0123935	0.0642912	0.449651	0.01433	0.0422153	0.417119
Bijie	0.00999829	0.0392241	0.422663	0.0257221	0.0262348	0.476158
Tongren	0.0251276	0.0777385	0.449941	0.0137417	0.0585002	0.374951
Kunming	0.00841043	0.0222876	0.367115	0.0206056	0.158957	0.422624
Qujing	0.00695134	0.00556107	0.490665	0.0102284	0.0300894	0.456504
Yuxi	0.00615132	0.00369079	0.540496	0.00266557	0.0241952	0.422801
Zhaotong	0.019543	0.0105232	0.4089	0.0484065	0.0811786	0.431449
Lijiang	0.0333333	0.0173333	0.426667	0.0133333	0.134667	0.374667
Pu'er	0.0467762	0.011378	0.512642	0.0126422	0.0834387	0.333123
Lincang	0.052226	0.0119863	0.454623	0.0171233	0.105308	0.358733
Changdu	0	0	0.639706	0	0.0588235	0.301471
Linzhi	0	0	0	0	0.5	0.5
Tongchuan	0.0020008	0.0020008	0.641857	0.010004	0.0132053	0.330932
Baoji	0.00437637	0.00778021	0.532215	0.0126428	0.0362266	0.406759
Xianyang	0.00623475	0.017891	0.495798	0.0157224	0.0490648	0.415289
Weinan	0.00286584	0.00573169	0.486835	0.00626903	0.0195236	0.478775
Yan'an	0.01566	0.00671141	0.377517	0.0391499	0.060962	0.5
Hanzhong	0.0106334	0.0157189	0.527508	0.0203421	0.00323625	0.422561
YulinSX	0.00187897	0.00152444	0.487503	0.00705499	0.00648775	0.495551
Ankang	0.0260116	0.0216763	0.401734	0.0274566	0.166185	0.356936
Shangluo	0.0184397	0.0141844	0.378723	0.0638298	0.131915	0.392908
Jiayuguan	0.00015748	0.00125984	0.499843	0.00125984	0.00393701	0.493543
Jinchang	0.0023753	0.00395883	0.503167	0.00118765	0.0110847	0.478226
Baiyin	0.00617708	0.00388927	0.499886	0.00640586	0.0194464	0.464196
Tianshui	0.0173847	0.0166289	0.38322	0.0536659	0.126984	0.402116
Wuwei	0.0223285	0.0207337	0.409091	0.0183413	0.0653907	0.464115
Zhangye	0.0161538	0.0115385	0.407692	0.0330769	0.0530769	0.478462
Pingliang	0.00380762	0.00420842	0.484369	0.0274549	0.0204409	0.459719
Jiuquan	0.00847458	0.0118644	0.436158	0.0587571	0.0418079	0.442938
Qingyang	0.0373832	0.026999	0.23676	0.0778816	0.125649	0.495327
Dingxi	0.0201342	0.0305742	0.425056	0.0231171	0.105145	0.395973
Longnan	0.0224626	0.0124792	0.435108	0.0665557	0.114809	0.348586
Haidong	0.00594943	0.0148736	0.590977	0.0446207	0.0505702	0.293009
Yinchuan	0.000148285	0.00137164	0.488786	0.00189064	0.0101205	0.497683
Shizuishan	0.000408219	0.00108858	0.495033	0.0035379	0.00721187	0.49272
Wuzhong	0.00128884	0.00229128	0.513533	0.0057282	0.0146069	0.462552
Guyuan	0.00647249	0.00889968	0.432848	0.00404531	0.0695793	0.478155
Zhongwei	0.00168824	0.0030951	0.555431	0.00844119	0.0225098	0.408835
Karamay	0.00293734	0.00195822	0.482376	0.00391645	0.00881201	0.5
Turpan	0.00289017	0.0017341	0.467341	0.0193642	0.00895954	0.499711
Kumul	0.00102386	0.000866346	0.491848	0.00732456	0.00252028	0.496416
