# Supplementary material for: Bridging carbon footprint and urban livability differences in Chinese non-core cities: a typological exploration
Source: Research Square preprint supplement (doi:10.21203/rs.3.rs-3993809/v1), 2024-03-05
Supplement: Supplementary file 2 [file 63b20a373ed5b8143dd80fc5.xlsx]

## Sheet: Sheet1
city_name	Cluster
Tangshan	3
Qinhuangdao	3
Handan	3
Baoding	4
Zhangjiakou	3
Chengde	2
Cangzhou	3
Langfang	4
Hengshui	4
Datong	3
Changzhi	3
Jincheng	3
Jinzhong	3
Yuncheng	3
Xinzhou	3
Linfen	3
Lvliang	3
Baotou	3
Wuhai	3
Chifeng	3
Tongliao	3
Ordos	3
Hulunbuir	3
Bayannur	3
Ulanqab	3
Anshan	3
Fushun	3
Benxi	3
Dandong	3
Jinzhou	3
Yingkou	3
Fuxin	3
Liaoyang	2
Panjin	3
Tieling	3
Chaoyang	3
Huludao	3
Jilin	3
Siping	3
Liaoyuan	3
Tonghua	3
Baishan	3
Songyuan	3
Baicheng	3
Qiqihar	4
Shuangyashan	3
Daqing	3
YichunHLJ	3
Jiamusi	4
Qitaihe	3
Mudanjiang	4
Wuxi	3
Xuzhou	3
Changzhou	2
SuzhouJS	3
Nantong	3
Lianyungang	3
Huai'an	3
Yancheng	3
Yangzhou	3
Zhenjiang	3
TaizhouJS	3
Suqian	1
Wenzhou	3
Jiaxing	3
Huzhou	2
Shaoxing	3
Jinhua	3
Quzhou	2
Zhoushan	3
TaizhouZJ	3
Lishui	1
Wuhu	2
Bengbu	3
Huainan	3
Ma'anshan	3
Huaibei	3
Tongling	2
Anqing	3
Huangshan	1
Chuzhou	2
Fuyang	4
SuzhouAH	3
Lu'an	4
Bozhou	4
Chizhou	2
Xuancheng	2
Putian	3
Sanming	2
Quanzhou	3
Zhangzhou	3
Nanping	4
Longyan	2
Ningde	3
Jingdezhen	3
Pingxiang	3
Xinyu	3
Yingtan	3
Ganzhou	2
Ji'an	3
YichunJX	3
FuzhouJX	3
Shangrao	2
Zibo	3
Zaozhuang	2
Dongying	3
Yantai	3
Weifang	3
Jining	3
Tai'an	3
Weihai	3
Rizhao	3
Linyi	3
Dezhou	3
Liaocheng	3
Binzhou	3
Heze	3
Kaifeng	3
Luoyang	3
Pingdingshan	3
Anyang	3
Hebi	3
Xinxiang	2
Jiaozuo	3
Puyang	3
Xuchang	3
Luohe	4
Sanmenxia	3
Nanyang	4
Shangqiu	3
Xinyang	4
Zhoukou	1
Zhumadian	4
Huangshi	2
Shiyan	4
Xiangyang	4
Ezhou	3
Jingmen	2
Xiaogan	4
Jingzhou	4
Huanggang	4
Xianning	3
Suizhou	1
Zhuzhou	4
Xiangtan	3
Hengyang	4
Shaoyang	4
Yueyang	4
Changde	4
Zhangjiajie	4
Yiyang	4
Chenzhou	4
Yongzhou	4
Huaihua	4
Loudi	3
Shaoguan	3
Zhuhai	3
Shantou	3
Foshan	3
Jiangmen	3
Zhanjiang	3
Maoming	4
Zhaoqing	2
Huizhou	3
Meizhou	2
Shanwei	3
Heyuan	4
Yangjiang	3
Qingyuan	2
Dongguan	3
Zhongshan	3
Chaozhou	3
Jieyang	3
Yunfu	2
Liuzhou	3
Wuzhou	1
Beihai	3
Fangchenggang	3
Qinzhou	3
Guigang	2
YulinGX	2
Baise	3
Hezhou	3
Hechi	2
Laibin	3
Chongzuo	2
Luzhou	3
Deyang	4
Mianyang	4
Guangyuan	2
Suining	1
Neijiang	3
Leshan	2
Nanchong	1
Meishan	4
Yibin	3
Ya'an	4
Bazhong	4
Ziyang	1
Liupanshui	3
Zunyi	4
Anshun	4
Bijie	4
Tongren	4
Qujing	3
Yuxi	2
Zhaotong	4
Lijiang	4
Pu'er	2
Lincang	4
Tongchuan	2
Baoji	2
Xianyang	2
Weinan	3
Yan'an	3
Hanzhong	2
YulinSX	3
Ankang	4
Shangluo	4
Jinchang	3
Baiyin	3
Tianshui	4
Wuwei	4
Zhangye	3
Pingliang	3
Jiuquan	4
Qingyang	1
Dingxi	4
Longnan	4
Haidong	2
Yinchuan	3
Shizuishan	3
Wuzhong	3
Guyuan	3
Zhongwei	2
Karamay	3
Kumul	3
