# Supplementary material for: Bridging carbon footprint and urban livability differences in Chinese non-core cities: a typological exploration
Source: Research Square preprint supplement (doi:10.21203/rs.3.rs-3993809/v1), 2024-03-05
Supplement: Supplementary file 3 [file 674a40957e9563d4860f9ae4.xlsx]

## Sheet: Sheet1
city_name	Population concentration	Economic strength	Space for development	Housing affordability	Housing supply	Housing environment	Daily life vitality	Cultural vitality	Informational visibility	Practical innovation	Education for innovation	Innovation support	Potential of employment	Income of employment	Entrepreneurial environment	Environment quality	Ecology quality	Energy efficiency	Social welfare guarantee	Basic education support	Urban infrastructure condition
Tangshan	772	7211	8.25	0.105543	34.41	16.507	18.6515	0.962435	2710.06	14.7111	10.7539	11998.1	1837	82483	251.415	41.3116	0.643741	4.24	0.327076	44.6425	20.5229
Qinhuangdao	314	1686	2.34	0.126107	34.95	17.6021	9.15039	0.570064	3652.86	13.9682	17.1083	10837	429	85609	252.828	35.3482	0.72236	2.91	0.32791	50.2771	17.8959
Handan	941	3637	4.53	0.129973	37.02	16.7038	13.4733	0.235919	3866.18	7.18172	4.75133	8387.2	1435	71148	244.123	53.3564	0.721936	3.97	0.173134	69.0797	19.9647
Baoding	1155	3954	6.21	0.116053	43.65	13.0071	11.3703	0.250216	2451.43	11.3619	9.75758	10713.5	1645	75635	248.541	43.8828	0.745522	1.92	0.145727	51.2684	23.6536
Zhangjiakou	412	1600	3.11	0.0959266	32.11	10.8786	2.87052	0.407767	3018.63	6.17233	7.80097	15608.6	452	73958	244.975	26.7798	0.695502	2.84	0.277852	48.9636	20.9498
Chengde	335	1550	2.13	0.106815	33.92	19.9761	2.09718	0.325373	1757.37	6.4209	9.4806	13407.8	399	73929	239.724	26.1945	0.80288	3.74	0.248108	57.9761	22.1438
Cangzhou	730	3700	4.51	0.11808	34.51	12.7051	15.0661	0.39863	2460.33	12.4603	5.68082	10069.2	2100	80905	240.452	48.3811	0.671283	1.48	0.179066	58.0479	21.171
Langfang	549	3301	4.99	0.114381	38.86	14.9954	26.5463	0.615665	2118.61	18.0474	15.4718	11874.2	1222	92653	273.63	45.9331	0.668746	1.14	0.206365	55.4499	22.1885
Hengshui	421	1560	2.7	0.103872	39.35	15.5191	9.09367	0.280285	1783.92	11.1496	2.75297	9972.76	978	68819	245.271	50.7538	0.786097	1.23	0.165772	55.7411	18.6266
Datong	310	1370	2.31	0.0721837	31.87	15.8723	6.79186	0.390323	1852.37	6.24194	5.03226	12521.8	364	75145	245.974	29.84	0.647706	3.38	0.269235	51.171	18.6788
Changzhi	318	1712	1.86	0.114057	41.21	14.8689	7.27201	0.672956	1397.84	7.2044	6.93711	12455.3	497	71306	247.748	41.0145	0.76393	3.78	0.2202	40.6447	16.1804
Jincheng	219	1426	1.3	0.108162	38.45	17.3337	6.62618	0.694064	1258.88	5.14155	1.72146	12968.1	425	73443	263.2	42.3114	0.765326	2.91	0.255801	38.4977	17.6588
Jinzhong	338	1469	1.87	0.0927296	35.07	13.9434	6.59661	0.736686	997.863	7.24556	31.6746	11838.6	806	74469	255.267	39.0172	0.730276	3.59	0.222945	40.3817	25.9616
Yuncheng	477	1644	3.06	0.0839543	42.43	13.2672	5.78704	0.350105	1630.18	5.35639	5.81551	8756	607	65317	251.461	47.9282	0.704331	4.99	0.156164	53.587	18.8902
Xinzhou	269	1035	1.57	0.0898526	31.19	14.8883	3.68027	0.394052	1570.63	2.79926	4.88104	15049.6	478	69414	241.136	32.0375	0.69655	3.28	0.183643	55.7807	24.4899
Linfen	397	1505	2.07	0.0902289	38.2	14.4143	4.46164	0.609572	1407.57	3.83123	7.41058	11067.1	500	71121	249.59	41.5789	0.735067	4.58	0.18099	54.3829	11.988
Lvliang	339	1538	2.22	0.0598659	30.11	13.9299	5.22511	0.418879	1249.65	4.12094	2.61947	13602.9	588	76906	241.321	35.5495	0.696704	5.64	0.146667	48.59	13.1279
Baotou	271	2787	3.24	0.0841645	34.27	15.6156	2.38481	6.94834	1646.45	1.369	17.2804	13997.3	460	86333	257.841	27.1818	0.364024	4.36	0.401697	31.9926	17.6949
Wuhai	56	563	1.65	0.0536477	38.34	22.6642	17.3486	1.30357	1065.1	10.3929	4.92857	20217.3	158	88270	259.251	35.4671	0.244297	8.91	0.344029	30.6786	45.6947
Chifeng	404	1763	3.27	0.0986776	33.1	20.3527	1.09376	0.514851	1596.59	3.60149	4.75743	15209.9	271	79912	229.412	22.8786	0.618761	3.84	0.118299	48.9604	25.5769
Tongliao	287	1277	3.6	0.0744741	32.98	21.2124	1.10614	0.466899	1455.73	0.209059	4.49826	13448.2	233	81558	224.564	28.5051	0.646558	6.12	0.19723	50.2509	27.0022
Ordos	216	3534	4.11	0.0703274	40.03	37.428	2.10747	1.28704	2578.76	12.7222	4.89815	30726	458	102903	254.573	30.9535	0.342716	6.06	0.247801	55.4676	56.7917
Hulunbuir	224	1172	4.23	0.0585397	33.91	15.4125	0.258683	0.772321	2138.75	1.38839	7.40179	20875.9	136	78803	235.33	16.5311	0.780072	5.77	0.344817	43.5312	23.1992
Bayannur	154	874	2.17	0.0616321	38.27	11.4854	0.521783	0.564935	1304.96	5.64286	4.16883	19880.6	264	83608	242.141	30.4648	0.278851	3.17	0.250747	35.4481	28.5183
Ulanqab	170	827	2.49	0.0586235	32.55	34.1731	1.06555	0.4	1550.08	0.0588235	7.56471	22802	279	81305	231.008	24.363	0.447686	8.09	0.310521	39.3412	39.0362
Anshan	332	1739	2.8	0.0601888	34.23	13.817	8.17884	1.01205	1713.06	11.2289	6.0994	10483	707	70993	244.682	34.6434	0.823026	4.67	0.373407	30.7651	22.0379
Fushun	186	828	1.47	0.0635764	32.49	12.7763	3.51904	0.596774	1373.47	10.1505	10.5484	11025.9	260	74909	245.23	30.2411	0.874733	3.47	0.51014	31.9731	18.0973
Benxi	132	810	1.06	0.0721046	31.79	11.2511	4.32282	1.31061	1070.2	7.50758	15.6515	12994.5	223	64857	238.514	28.5514	0.879072	7.27	0.61057	32	22.567
Dandong	218	779	1.41	0.0965499	33.43	12.418	2.39737	0.477064	2041.8	9.56422	6.66514	11253.1	377	61537	241.89	28.887	0.850029	2.18	0.262802	35.5	17.4015
Jinzhou	270	1072	1.82	0.072956	35.95	13.5784	6.00059	0.662963	1765.8	6.5963	17.8926	11149.3	338	71400	235.06	37.1719	0.722018	6.02	0.306999	34.0815	9.88771
Yingkou	233	1325	3.15	0.0648724	35.69	12.2917	13.5603	0.733906	1336	9.78541	5.17167	11533.8	680	72505	243.405	35.3086	0.728984	4.69	0.374549	29.4678	33.8917
Fuxin	165	505	1.51	0.0566796	34.47	12.6106	2.56228	0.333333	1326.18	6.21212	11.4485	11448.5	210	63670	227.782	33.3686	0.737291	3.26	0.343227	36.697	23.7134
Liaoyang	160	838	1.41	0.0528242	35.18	12.0531	12.4183	0.74375	1145.16	7.74375	6.78125	12573.8	248	73390	236.375	37.5003	0.809892	4.5	0.485234	32.3375	20.3061
Panjin	131	1304	2.14	0.0590344	40.39	15.2975	18.2807	0.839695	1350.75	11.5573	4.10687	18638.1	304	68858	254.434	38.1794	0.719557	1.37	0.456926	37.5649	24.7383
Tieling	238	663	1.57	0.0524565	32.18	13.0538	3.64396	0.273109	1113.47	5.57143	5.27311	9953.69	298	71582	224.383	36.0881	0.83527	5.75	0.264684	38.5042	13.2124
Chaoyang	287	876	1.59	0.071031	33	17.4039	3.20724	0.351916	643.392	5.47387	1.56794	11286.3	323	67895	216.048	31.5422	0.713329	4.28	0.146033	46.1568	11.6097
Huludao	243	770	2.01	0.0751667	35.03	18.2341	5.30096	0.436214	1817.33	7.48971	2.50617	10442	269	68269	231.928	33.9421	0.73773	3.43	0.266265	42.358	37.9836
Jilin	362	1453	2.85	0.0911289	33.13	14.0289	2.51313	1.03315	1776.33	6.10221	15.6989	12320.1	425	71733	242.077	31.9829	0.873465	3.6	0.369347	35.7376	23.3432
Siping	181	527	1.79	0.0670605	33.16	11.4904	3.74932	0.375691	1206.63	4.43646	12.6188	14215.3	170	67134	222.789	36.2262	0.805675	5.29	0.349265	68.8674	13.6324
Liaoyuan	100	430	0.7	0.0690517	31.67	12.2682	4.01538	0.52	807.588	3.84	3.32	13797.6	104	66603	228.17	34.4908	0.845084	2.54	0.345812	50.86	10.823
Tonghua	130	749	1.53	0.0758387	32.88	15.9215	2.46271	0.630769	1019.41	5.73077	5.71538	21876.4	333	65126	235.024	28.5829	0.877734	4.43	0.560857	47.5385	7.1938
Baishan	95	509	1.1	0.061368	32.26	10.0308	1.39317	1.15789	588.784	2.70526	2.57895	21368.7	159	63022	236.042	24.5317	0.888384	1.69	0.5296	35.0737	12.5071
Songyuan	225	753	1.43	0.0599502	33.26	12.4259	2.58749	0.448889	989.902	2.68444	1.59556	13217.8	209	75817	218.477	33.4541	0.744803	1.73	0.212224	48.0933	15.7429
Baicheng	155	510	1.59	0.0626497	34.73	13.2621	1.34086	0.406452	961.725	3.50968	1.04516	18085.7	156	69606	220.785	27.7222	0.67163	2.96	0.308212	54.3871	31.0874
Qiqihar	404	1200	3.27	0.0739894	32.58	16.3913	1.62877	0.643564	3088.16	5.7104	9.5099	13092.2	351	69460	224.64	25.5803	0.823615	3.16	0.182343	30.9109	11.8843
Shuangyashan	120	494	1.44	0.0407946	33.42	13.9576	1.26139	0.525	1013.14	0.075	3.125	14901.3	152	64267	228.059	23.9424	0.869368	4.3	0.371534	28.1	11.4582
Daqing	278	2301	3.9	0.0502226	35.76	14.5931	5.71247	0.604317	1662.04	12.6079	13.0576	12118.7	490	96088	252.226	29.7214	0.708573	1.5	0.223485	27.2986	26.0467
YichunHLJ	87	294	1.41	0.0881554	33.48	39.1738	0.523054	1.45977	1150.82	4.37931	2.06897	22823.7	63	50319	231.036	18.5682	0.898378	4.46	0.329885	39.5057	20.8383
Jiamusi	215	812	1.96	0.0762921	34.15	15.0185	1.61461	0.455814	2214.16	5.45581	12.0093	15897.2	319	57737	238.521	24.9787	0.840969	1.74	0.137674	28.9953	12.0166
Qitaihe	69	206	0.78	0.0513133	31.99	15.3351	3.50255	0.536232	856.765	6.02899	2.42029	18117.2	102	62859	225.239	24.1789	0.852829	12.49	0.268948	32.7391	12.065
Mudanjiang	228	832	2.11	0.0752798	33.44	10.9084	1.07681	0.557018	1655.2	4.08333	12.8947	12491	286	64465	244.797	23.0264	0.879302	1.58	0.174228	32.0833	16.407
Wuxi	746	12370	9.55	0.125689	43.75	15.0166	41.4022	1.29088	5811.41	81.37	9.41019	16287.3	7006	115748	301.631	34.093	0.614752	0.86	0.555201	33.5214	26.8375
Xuzhou	908	7320	8.14	0.109877	48.58	17.7538	17.0535	0.493392	5857.29	30.141	10.1531	10552.7	2024	86138	281.266	48.834	0.727296	1.28	0.235563	56.1784	22.6936
Changzhou	528	7805	5.94	0.124331	45.55	14.9094	34.7077	1.02841	4645.96	78.2595	13.3655	13755.9	5065	113273	304.521	36.3888	0.628614	0.97	0.325111	35.2784	23.9445
SuzhouJS	1275	20170	20.14	0.176301	41.59	12.3522	44.9182	2.03529	8786.2	108.911	10.9043	17753	11900	113744	309.798	32.0267	0.51976	0.94	0.468891	37.7922	23.8215
Nantong	773	10036	6.98	0.159351	56.29	19.2792	25.0903	0.941785	3573.27	39.6662	7.31307	13979.6	5365	92542	293.119	31.2553	0.614364	0.49	0.224673	27.6507	29.4703
Lianyungang	460	3277	3.92	0.105278	52.53	15.4429	17.7015	0.795652	4081.33	17.5174	5.42391	10906.3	985	92008	280.782	40.2755	0.712178	1.52	0.238083	60.7826	26.3509
Huai'an	456	4025	4.35	0.112781	48.75	15.3197	10.6583	0.993421	3087.39	25.807	9.65789	12461.6	1486	83216	279.232	39.6295	0.736539	0.71	0.207098	51.9737	24.2355
Yancheng	671	5953	6.22	0.11792	45.68	15.9006	12.4383	0.891207	3351.86	32.0909	5.98957	14509.7	3139	89727	276.495	34.0034	0.710933	0.61	0.180417	41.7422	26.6011
Yangzhou	456	6048	4.9	0.146692	48.69	20.1855	19.6853	1.26316	4110.76	62.4693	13.5592	14655.7	3039	87874	289.859	37.1718	0.718647	0.7	0.352268	31.9934	26.6437
Zhenjiang	321	4220	3.84	0.104253	48.59	18.1294	32.5968	1.87539	2860.06	61.7259	20.3738	15541.9	2011	93129	293.469	36.7965	0.681514	1.39	0.269304	33.3333	29.8335
TaizhouJS	452	5313	4.44	0.117103	55.46	16.5012	26.2003	0.780973	2581.43	45.0487	7.52212	13883.6	2861	85944	287.34	36.0122	0.683568	0.73	0.308758	31.5155	31.6167
Suqian	499	3262	4.45	0.1214	42.75	16.9876	12.6415	0.501002	3099.84	27.976	2.73146	11812.5	2065	78697	276.221	42.7524	0.722855	0.66	0.155571	57.4068	28.033
Wenzhou	959	6871	4.91	0.193908	40.32	12.6526	18.9295	1.48905	3956.02	54.4307	6.878	10710.8	6724	96775	297.215	20.8874	0.722635	0.56	0.354902	39.1616	15.0433
Jiaxing	541	5510	6.38	0.112688	50.14	15.419	41.9602	1.99261	2961.51	64.6322	7.65989	13164.2	6364	107614	300.483	29.7553	0.567752	0.77	0.364803	29.2717	26.6274
Huzhou	337	3201	2.77	0.100161	52.46	17.9117	23.8495	1.07418	3509.78	52.5579	5.69733	14374.6	3792	97620	295.532	29.2476	0.71164	1.07	0.50348	29.8131	29.1382
Shaoxing	529	6001	4.84	0.191829	52.33	14.758	20.2533	1.40643	2597.78	67.2476	11.0378	12611.8	4561	85837	293.206	25.3485	0.744411	0.84	0.486624	31.3913	22.653
Jinhua	706	4704	5.45	0.162024	45.96	12.602	17.7321	0.815864	1953.84	60.1218	8.11898	9963.37	4629	96589	307.334	24.1586	0.771025	1.07	0.371726	35.7337	25.7187
Quzhou	228	1639	2.06	0.126111	69.89	16.607	7.20068	1.66228	3548.14	28.7588	3.33772	20160.1	1131	124605	288.237	23.1599	0.796187	2.37	0.410253	39.7982	34.7265
Zhoushan	116	1512	1.25	0.123758	43.97	16.0587	34.9081	2.11207	3075.43	24.181	12.6638	26955.6	391	108495	291.142	23.1469	0.47802	1.26	0.567166	32.7328	22.6931
TaizhouZJ	663	5263	4.83	0.165472	46.97	14.5016	18.6164	1.39517	3462.1	52.5309	3.21267	10560.2	4611	91307	290.206	21.6631	0.705709	0.65	0.403892	37.092	24.6748
Lishui	251	1540	1.61	0.0724714	48.79	12.2185	3.62493	1.251	2240.08	46.239	5.11952	20999.9	1207	115583	284.278	20.1554	0.835388	0.68	0.390266	42.1434	19.8427
Wuhu	365	3753	3.65	0.107107	40.46	13.4914	16.1293	0.632877	4939.8	36.2411	20.3836	13305.1	1777	83593	290.046	33.4932	0.714321	1.64	0.270284	33.2548	25.4513
Bengbu	330	2083	2.17	0.0872285	44.32	14.7086	9.79765	0.827273	3389.76	13.6758	10.4394	9876.97	1061	80102	259.869	43.9612	0.782119	0.74	0.228378	51.2424	26.8296
Huainan	303	1337	1.97	0.0561582	40.52	14.5113	10.9416	0.310231	1670.27	10.7624	10.7525	9508.48	723	96671	255.556	43.2681	0.771693	4	0.222141	45.4356	18.5485
Ma'anshan	216	2187	2.09	0.0827685	39.94	15.3802	16.0546	1.08796	2433.75	36.2454	16.3056	12260.3	1134	92490	274.734	34.7335	0.710881	2.82	0.331566	34.8009	24.9141
Huaibei	197	1119	1.58	0.0832554	46.49	18.2081	17.8815	0.522843	1381.92	14.8477	11.4772	9327.97	639	85560	253.836	47.8954	0.76842	2.68	0.276631	44.4467	21.8467
Tongling	131	1004	1.27	0.0798155	43.44	15.6459	9.61631	1.91603	1348.51	18.1832	12.0992	13930.2	493	85332	264.99	33.4057	0.715847	4.84	0.291735	39.2977	23.1636
Anqing	417	2468	2.46	0.088895	49.14	15.9394	4.67358	0.793765	2443.76	13.1391	5.03357	11581.7	1644	79459	257.725	29.7746	0.764756	1	0.194117	40.8201	34.0784
Huangshan	133	850	1.18	0.0897808	54.13	19.2042	1.55357	0.947368	4987.61	11.6466	9.55639	15506.2	537	82877	267.52	22.0306	0.840918	0.54	0.272228	38.3534	36.5026
Chuzhou	399	3032	4.44	0.0777634	38.96	20.3381	8.34201	0.578947	2313.47	21.6892	7.57895	11602.5	1870	83281	264.881	37.8166	0.784316	1.12	0.16003	36.193	41.8168
Fuyang	820	2805	4.07	0.0845282	53.8	18.3672	13.9756	0.226829	3380.33	8.72317	2.93293	8187.19	1657	78062	250.711	46.9099	0.745007	0.8	0.0774182	48.0232	24.9513
SuzhouAH	533	2045	2.66	0.0830587	49.32	18.7621	8.93649	0.285178	1742.55	7.73358	2.50657	9118.18	1012	74188	242.507	47.0691	0.775357	0.94	0.0875146	48.0694	32.1989
Lu'an	439	1670	3.17	0.071814	46.11	16.4135	5.31654	0.339408	2197.61	12.303	5.13667	11512.3	1034	88247	267.251	33.7562	0.803871	0.66	0.11692	45.287	30.6768
Bozhou	500	1806	2.58	0.0796712	55.36	18.3742	8.4273	0.298	2105.59	8.904	1.918	7819.25	617	70775	246.733	48.0754	0.797071	0.56	0.0879102	55.684	42.1516
Chizhou	134	869	1.17	0.0936592	51.85	20.0717	3.1908	0.552239	1390.63	17.7164	8.17164	13291.7	539	84912	258.289	27.3961	0.820057	3.03	0.17706	38.7388	27.0875
Xuancheng	250	1607	2.58	0.0928762	47.42	18.8323	4.67949	0.572	1590	21.28	1.368	12992.3	1572	82058	263.497	27.6321	0.788622	1.8	0.30534	36.392	35.1633
Putian	321	2644	1.37	0.156461	67.04	15.98	20.3526	0.34891	3285.14	14.2679	3.26791	7983.62	1114	75316	281.333	19.3633	0.713933	0.75	0.151651	46.6947	21.4283
Sanming	249	2702	1.75	0.106187	48.13	15.4661	2.36213	1.15663	1051.16	14.5221	6.3253	13431.4	1787	90508	269.572	19.7644	0.82792	1.82	0.179072	51.6827	28.3848
Quanzhou	879	10159	5.19	0.175865	54.26	14.95	20.5998	1.20023	4332.2	63.653	9.73379	8135.8	5357	76330	287.606	19.8331	0.720984	0.63	0.202404	42.2435	29.0778
Zhangzhou	505	4546	3.14	0.123361	50.16	16.3219	15.5218	0.328713	2223.12	24.1584	8.93465	8814.28	2376	89060	275.168	20.7214	0.71846	0.91	0.210913	41.697	24.5054
Nanping	268	2007	1.71	0.100936	47.44	14.0546	2.5146	0.645522	1220.51	10.6306	5.38433	12446.4	958	82487	263.854	20.0303	0.835231	0.55	0.268556	46.056	13.604
Longyan	273	2871	1.71	0.136135	52.78	17.0139	3.76112	0.952381	1331.39	15.989	5.06227	12201.9	1151	82970	275.94	19.8443	0.831024	1.46	0.176073	51.0476	23.84
Ningde	315	2619	1.26	0.134689	47.12	15.4772	6.87597	0.460317	1685.41	12.9968	2.21587	11335.5	1045	92223	282.403	19.4621	0.784239	0.93	0.180125	47.4381	21.3969
Jingdezhen	162	957	1.07	0.0903425	56.98	17.7144	4.91983	0.858025	2713.04	17.0679	14.1296	14560.3	416	72319	264.946	24.6111	0.813817	1.94	0.29019	44.8148	31.5453
Pingxiang	181	963	0.95	0.0562832	61.59	14.8349	4.573	1.62431	1481.61	11.9282	9.92265	15543.2	609	80056	249.796	25.7335	0.791328	2.15	0.314976	50.105	23.0179
Xinyu	120	1001	1.32	0.0648121	42.22	20.4227	4.98042	0.775	1242.82	19.5417	20.5583	13717.1	510	85324	256.971	28.8064	0.765239	2.85	0.299705	51.1917	25.8755
Yingtan	115	983	1.04	0.0761554	54.28	17.3442	5.66902	0.408696	1071.86	19.9217	4.64348	16432.2	389	79399	256.243	26.187	0.764355	0.88	0.231977	53.4783	28.5327
Ganzhou	897	3645	4.81	0.114778	53.67	16.1686	2.64409	0.54738	3153.53	19.6343	7.22742	10889.1	2332	75085	263.52	21.657	0.800274	1.01	0.161641	56.2999	24.325
Ji'an	447	2168	2.98	0.106832	60.49	20.4209	1.71934	0.668904	1650.71	14.2192	3.44072	12430.7	1662	70103	247.451	25.1681	0.797104	1.04	0.212047	51.2998	28.3793
YichunJX	501	2790	4.18	0.107117	57.09	17.8863	3.81153	0.371257	1801.12	14.4511	5.8503	13013.9	1896	70644	250.126	27.6511	0.787516	1.31	0.236613	57.9122	27.6988
FuzhouJX	362	1573	2.83	0.104126	51.79	18.22	2.23828	0.618785	1657.02	17.2956	4.22099	13811.6	923	71861	251.904	23.9148	0.808102	0.93	0.242818	56.5359	29.7069
Shangrao	649	2624	3.03	0.104316	64.71	19.5257	2.88202	0.260401	1686.02	9.63945	3.08475	11552.7	1915	72108	251.897	25.2051	0.786653	1.17	0.21181	57.2804	26.3168
Zibo	471	3673	5.05	0.096379	41.05	18.8074	19.5831	0.670913	2069.92	22.5754	13.0042	11099.4	1775	84758	269.982	47.0932	0.718327	2.07	0.285944	34.0913	31.4419
Zaozhuang	386	1733	3.1	0.10371	41.39	14.9646	17.5534	0.474093	1674.84	16.2798	5.17098	7021.56	739	75428	264.454	51.3722	0.737243	4.1	0.240779	58.1399	28.2046
Dongying	219	2981	4.98	0.0694408	45.1	26.6396	16.5194	1.54795	1928.25	32.1598	9.18721	14214.8	845	107271	275.983	45.3271	0.502366	1.39	0.299511	39.1735	34.303
Yantai	710	7816	8.69	0.103223	33.98	18.6152	13.1501	0.946479	2665.75	21.7761	17.3423	11906.8	2188	88339	273.773	33.9761	0.691405	0.88	0.388737	20.8014	29.3648
Weifang	939	5872	10.26	0.0786323	39.35	18.6548	16.8143	0.789137	2679.2	24.803	12.0682	8478.39	3521	82085	266.853	44.7411	0.671056	1.89	0.238558	42.8307	28.2034
Jining	836	4494	7.3	0.103862	38.43	19.9995	16.1139	0.648325	2596.14	15.9091	7.58014	8321.7	1941	85437	262.278	51.567	0.75356	1.66	0.205294	48.7715	37.5777
Tai'an	548	2766	4.46	0.13782	40.32	23.15	13.4305	0.357664	1863.69	12.2682	12.4124	7934.14	1097	75073	258.143	50.1089	0.732781	2.04	0.268442	37.8978	28.1898
Weihai	291	3018	4.27	0.116389	36.58	26.0872	16.922	1.29897	2759	29.244	17.5155	12041.9	1073	77022	280	26.9178	0.680608	0.62	0.460203	28.3436	41.8649
Rizhao	297	2006	3.43	0.112053	38.51	18.0233	14.2648	0.511785	1815.94	16.6465	6.19192	9649.72	797	85886	268.318	40.55	0.703977	3.05	0.267887	41.6263	22.8811
Linyi	1103	4805	9.06	0.104091	38.97	21.2179	14.3231	0.349955	4187.82	11.6664	4.49592	7185.33	3421	80594	263.017	45.3428	0.726934	2.13	0.159292	51.1614	27.9978
Dezhou	561	3079	5.81	0.109595	37.98	25.4456	11.3804	0.424242	2284.06	14.9465	6.58824	8577.54	1496	76721	244.488	49.5747	0.772404	1.74	0.180504	49.9483	30.1717
Liaocheng	595	2317	4.98	0.132732	42.09	12.5991	14.4085	0.70084	2190.12	12.3832	4.73782	7831.75	1436	79960	248.574	53.5077	0.769824	2.97	0.152759	60.4319	24.7278
Binzhou	393	2508	5.15	0.08402	41.71	31.4753	15.9044	0.597964	1901.55	19.0891	8.18321	11386.9	1316	80233	257.357	47.5672	0.637151	5.76	0.22819	43.6387	40.5847
Heze	880	3483	5.79	0.0825204	40.56	15.2803	14.2799	0.225	2041.8	8.94091	2.75455	7167.72	1908	71449	242.588	53.0334	0.779769	1.4	0.143023	59.5602	38.0026
Kaifeng	483	2372	2.57	0.100652	44.35	15.1096	12.1199	0.300207	2547.33	6.34783	12.7805	8919.03	1092	60758	260.018	53.6227	0.762861	0.77	0.122351	60.0435	22.0913
Luoyang	706	5128	4.47	0.108441	46.96	16.13	7.88781	0.706799	5848.47	15.8088	11.5836	9759.67	1785	77000	270.513	43.0359	0.775366	0.94	0.129268	41.7507	14.0921
Pingdingshan	499	2456	2.59	0.0887525	41.3	12.8145	10.4539	0.408818	1876.06	6.95792	8.30261	8176.9	878	65272	252.089	48.7094	0.761755	1.66	0.138233	53.6293	18.5241
Anyang	548	2300	3.12	0.0875262	46.79	13.2426	14.4	0.430657	2210.2	6.18796	10.7974	7867.11	779	67048	251.996	54.1047	0.74479	2.77	0.202411	50.7774	20.9754
Hebi	157	981	1.31	0.11835	45.52	20.718	15.8957	0.509554	1365.76	7.38217	8.18471	9945.29	399	58297	255.164	55.6723	0.752585	1.75	0.18907	48.5414	21.402
Xinxiang	626	3014	4.51	0.10251	52.67	12.8791	15.0137	0.271565	1775.16	16.9026	16.5767	7557.88	1499	63509	259.307	53.0146	0.769166	1.6	0.214225	46.0128	15.5149
Jiaozuo	352	2124	3.04	0.0815616	52.22	16.7672	18.0707	0.4375	1411.49	13.9915	16.1705	9125.82	848	64602	263.993	53.2745	0.730604	1.55	0.234348	44	24.1568
Puyang	377	1650	2.43	0.098682	40.14	14.9251	18.4866	0.64191	1889.98	6.24138	4.03979	9456.8	630	73100	251.025	55.443	0.76337	0.88	0.0967886	58.695	18.3485
Xuchang	438	3449	2.68	0.0838276	49.08	16.0669	15.0933	0.431507	2199.88	12.0434	7.41324	8310.64	1539	67237	261.809	52.2482	0.76854	0.79	0.186655	51.0845	32.8975
Luohe	237	1574	1.7	0.0823694	47.31	18.3488	14.5741	0.316456	1611.76	12.0886	8.95359	9830.56	559	63931	259.112	52.6474	0.799042	0.59	0.122941	49.1435	19.144
Sanmenxia	204	1451	1.43	0.0738639	42.46	14.1846	4.23783	0.710784	1761.12	5.93137	6.40686	13284.5	397	69767	259.387	37.9402	0.785862	1.66	0.171162	51.9804	13.4238
Nanyang	972	3926	4.83	0.127263	43.45	16.8337	4.18406	0.262346	3066.27	7.71296	6.35288	7659.45	1475	61104	252.326	43.6159	0.795993	1.11	0.0740865	68.034	15.4435
Shangqiu	782	2926	4.24	0.0937515	49.26	14.4955	10.9004	0.138107	2318.12	5.29795	8.84015	7181.3	1564	60509	246.773	51.1456	0.784667	0.82	0.122057	65.491	14.3056
Xinyang	624	2805	3.73	0.102035	44.7	14.6259	3.20209	0.258013	2712.73	5.48237	7.63942	9790.3	1251	62036	253.937	39.2253	0.79565	0.92	0.097597	64.2067	14.4613
Zhoukou	902	3267	3.46	0.0839932	52.14	14.9525	9.94932	0.125277	1584.33	3.80155	3.26386	7644.44	1424	57587	239.629	50.6046	0.793917	0.52	0.070804	70.9102	22.8316
Zhumadian	701	2859	3.53	0.0976897	47.83	17.4885	7.5562	0.706134	2124.41	4.68474	2.57632	8925.85	1164	60574	246.803	46.597	0.783836	0.87	0.0693481	66.5735	28.5787
Huangshi	247	1641	1.93	0.0764816	48.58	16.9873	8.95492	0.773279	2163.92	16.3198	11.9109	11592.7	704	73486	265.366	32.4689	0.73837	2.35	0.340613	46.2227	29.7058
Shiyan	317	1915	1.82	0.0718433	39.27	15.4844	1.48821	0.507886	2087.47	12.817	8.12934	14486.7	950	80481	259.063	28.8263	0.845193	0.61	0.188058	46.2366	24.5653
Xiangyang	526	4602	3.47	0.105922	48.91	16.8145	3.19842	0.547529	3782.63	13.4829	4.29087	12743	1697	78512	261.589	37.9512	0.805382	0.57	0.24685	34.0951	17.2255
Ezhou	108	1005	1.06	0.0644702	49.9	16.2871	19.8369	1.25	1692.61	11.8981	7.81481	11796.9	492	82032	271.694	36.0207	0.674318	2.26	0.300678	43.7037	22.0587
Jingmen	254	1906	2.2	0.0577273	48.89	14.0042	2.61084	0.370079	1452.41	13.6102	3.60236	12320.3	982	83218	253.104	38.7648	0.777159	1.42	0.30622	31.1457	23.0444
Xiaogan	414	2194	2.72	0.0699847	45.94	13.0177	6.16377	0.463768	1990.67	10.2971	4.49034	10272	1174	71857	254.922	36.4961	0.753391	0.99	0.197074	33.3599	27.3653
Jingzhou	516	2369	3.28	0.0799679	48.99	12.6454	4.21733	0.263566	3383.73	10.3798	9.48837	10325.9	1239	61734	256.506	37.5911	0.708544	0.73	0.269099	27.6008	24.0196
Huanggang	579	2170	3.71	0.0679541	53.94	13.3812	3.79565	0.725389	2458.57	8.18826	4.33851	10273.6	1264	67847	253.054	31.6403	0.765368	0.86	0.181561	40.4249	19.0445
Xianning	268	1525	1.93	0.05677	50.49	15.7711	3.81404	0.518657	1743.49	13.6754	6.1903	11651.6	945	77732	258.389	29.2728	0.792172	1.48	0.181166	46.2724	52.5543
Suizhou	201	1097	1.34	0.0778835	44.71	13	2.01279	0.263682	1761.59	8.30846	2	9499.3	700	71143	251.444	37.1647	0.787499	0.49	0.172576	36.5124	18.0551
Zhuzhou	390	3106	2.72	0.0706802	54.47	12.0118	3.87966	0.923077	1931.63	18.9359	11.7974	12046.3	1780	84738	260.654	26.9137	0.793452	0.64	0.308051	39.7564	22.4522
Xiangtan	273	2343	2.13	0.0765319	47.11	12.2334	7.16926	0.622711	1307.51	5.18315	29.5385	10747.2	1217	71074	257.891	32.4748	0.764869	1.72	0.269304	34.8535	17.3007
Hengyang	664	3509	3.89	0.0789125	48.03	15.1322	3.22724	0.388554	2256.69	5.77259	10.9307	8697.51	1277	70240	245.513	30.7387	0.765316	0.83	0.209448	48.6687	17.3347
Shaoyang	656	2251	2.84	0.0669248	52.42	14.4522	1.79786	0.422256	1546.02	6.6814	3.41006	8997.48	1871	68987	232.755	26.4714	0.817884	0.86	0.0666768	48.5	20.6555
Yueyang	505	4002	3.3	0.0922091	45.93	12.9519	3.87723	0.384158	2099.43	8.22772	5.34059	10764.3	1690	68050	247.631	32.0631	0.761263	0.78	0.223171	40.3327	24.7884
Changde	528	3750	3.44	0.0859932	49.81	12.9219	3.2613	0.426136	2028.69	7.36932	6.08144	11628.5	1542	73745	246.083	34.3594	0.770647	0.75	0.269291	34.8883	27.852
Zhangjiajie	152	556	3.11	0.0959266	32.11	10.8786	2.87052	0.289474	3018.63	4.75658	5.70395	13021.1	223	79586	244.975	26.7798	0.695502	2.84	0.157669	41.375	20.9498
Yiyang	385	1853	2.03	0.0784668	46.48	14.9202	2.45144	0.272727	1288.84	9.73766	6.35065	10006	1290	72492	237.447	32.865	0.787603	0.87	0.182008	40.6623	30.2362
Chenzhou	468	2503	2.57	0.0788202	43.82	14.16	2.06455	0.369658	2700.14	6.45085	3.8953	9924.25	1186	74129	242.786	23.6018	0.812559	0.85	0.127846	56.7692	20.8539
Yongzhou	530	2108	2.72	0.0801422	48.8	12.0215	2.10001	0.845283	1624.55	5.77736	4.37736	9457.35	1199	66641	239.842	26.2854	0.807843	0.86	0.132443	56.7019	21.9682
Huaihua	458	1672	2.26	0.0670095	44.26	10.2939	1.2678	0.569869	1616.25	6.19869	4.26201	10517.8	752	76055	240.165	25.2731	0.841274	0.51	0.146338	48.548	11.6935
Loudi	383	1680	1.8	0.0773868	50.77	9.6394	3.76912	0.342037	1173.25	6.71279	5.82245	8603.75	1020	69412	240.416	29.3799	0.788539	3.31	0.216222	48.6789	23.6418
Shaoguan	286	1353	2.35	0.0510824	42.14	16.7022	3.58915	8.51049	1760.65	15.993	6.02797	13788.3	504	98366	255.352	22.1449	0.840071	2.91	0.257067	45.5455	13.452
Zhuhai	245	3482	3.48	0.194534	30.77	22.1831	40.8852	1.16327	3788.35	99.7306	27.8	27657.8	1492	107284	299.64	19.9562	0.451662	0.6	0.599529	33.4898	21.6507
Shantou	550	2731	3.39	0.116617	28.77	12.01	42.2749	0.570909	2764.12	39.9255	3.31636	7768.37	1928	84400	270.119	20.5038	0.559485	0.92	0.125792	41.5091	13.9044
Foshan	952	10816	10.78	0.135731	36.27	19.2477	44.4847	0.77416	3041.8	77.5945	4.39706	10536.2	8020	94536	292.923	23.094	0.543993	0.55	0.358509	36.3718	22.6463
Jiangmen	480	3201	5.22	0.0811622	35.75	20.0732	16.0591	0.90625	2028.84	35.1896	5.39167	9216.16	2535	88219	269.661	20.7133	0.732563	0.93	0.319475	40.6917	24.4036
Zhanjiang	698	3100	3.46	0.0931612	42.37	14.9551	11.096	0.32808	3298.1	7.82092	8.96705	7716.14	780	98028	251.053	21.0511	0.687319	1.63	0.149855	56.2006	14.7599
Maoming	618	3279	2.16	0.0787091	54.02	18.2114	8.41643	0.257282	1850.14	5.78479	4.29126	7460.35	751	86586	242.603	21.424	0.781214	0.5	0.131405	64.7848	18.2929
Zhaoqing	412	2311	3.19	0.0719918	37.27	20.2734	6.47752	0.832524	2245.29	15.3544	14.0024	10451.1	1281	90002	255.258	23.2908	0.82703	1.58	0.194967	50.1917	23.7664
Huizhou	606	4221	6.09	0.105609	34.24	16.8314	17.822	0.429043	4536.06	31.4488	4.19142	10517.7	3055	89840	283.788	20.9611	0.777541	1	0.300986	52.8201	18.2634
Meizhou	387	1208	2.27	0.0669449	43.44	19.1118	4.88522	1.06718	1631.96	10.5271	3.33333	12257.2	505	85160	250.109	21.1269	0.80529	2.27	0.260801	55.8424	20.6132
Shanwei	267	1124	1.42	0.0739799	32.64	15.394	18.0859	0.400749	1323.57	10.0075	1.92884	9981.47	258	85628	254.108	19.4949	0.684852	1.49	0.116945	62.1461	18.9625
Heyuan	284	1103	1.71	0.0704439	45.62	16.3529	3.76707	0.433099	1490.57	14.4296	1.62324	12738.1	581	86494	254.178	21.0283	0.818693	0.93	0.185823	60.2711	24.6551
Yangjiang	261	1360	2.07	0.064228	47.37	25.8232	7.55177	0.570881	1732.86	19.387	1.83142	9572.4	390	87212	257.692	20.1923	0.79768	2.07	0.161089	58.3908	33.9375
Qingyuan	397	1777	2.8	0.0708652	39.54	15.1597	5.33931	0.700252	1677.67	11.6902	1.5995	10373.9	834	92883	257.961	22.9753	0.833092	2.8	0.214122	55.398	24.7551
Dongguan	1048	9650	6.9	0.229854	27.8	21.6065	59.1177	1.12023	4306.59	70.8998	5.64027	8018.37	11525	79601	292.758	22.6484	0.522902	0.75	0.554342	40.0468	18.4774
Zhongshan	443	3152	5.55	0.115313	33.27	11.8014	50.7697	1.23702	1837.98	89.6117	2.88262	8479.24	3868	95309	292.718	20.3312	0.499427	0.85	0.438616	38.842	11.6413
Chaozhou	257	1097	2.12	0.071133	31.05	13.9088	18.2499	3.01167	1872.35	40.1206	4.88327	8450.04	939	83437	266.923	21.7751	0.709113	1.65	0.118301	42.463	11.5793
Jieyang	558	2102	3.02	0.0856461	23.76	15.1034	21.4916	0.28853	2245.1	16.3548	0.949821	6711.11	1397	69943	259.008	21.336	0.727421	0.91	0.111497	55.405	31.414
Yunfu	238	1002	1.51	0.0635117	43.63	18.2477	6.34218	0.613445	1216.39	8.04622	2.54622	11054.5	383	86847	246.377	21.784	0.821257	2.15	0.151975	63.2269	9.96194
Liuzhou	416	3177	3.19	0.0916304	40.35	12.9595	3.85971	0.516827	2814.31	14.1803	10.6779	11288	1052	86155	265.078	24.3831	0.823748	1.21	0.28154	43.2019	23.4627
Wuzhou	282	1081	1.54	0.0631646	45.13	15.0117	2.76653	0.421986	1366.16	4.56738	3.4078	10229	509	75836	241.986	24.2034	0.818003	0.67	0.165992	66.2057	27.2552
Beihai	185	1277	1.76	0.0706075	45.64	12.7078	10.2501	0.437838	4214.31	4.05405	11.8162	11504.3	279	80132	261.155	24.1394	0.684663	0.97	0.183938	50.9784	25.8691
Fangchenggang	105	733	1.23	0.0589649	42.85	24.9937	5.30892	0.990476	1776.25	3.28571	0.685714	14777.2	151	88304	259.987	22.9303	0.79654	3.77	0.145291	61.8095	35.5574
Qinzhou	331	1388	1.66	0.0556104	41.75	12.4467	3.78619	0.247734	1337.65	2.93656	5.00906	7214.57	338	73822	232.573	24.5169	0.79537	1.29	0.0923142	65.435	37.9574
Guigang	432	1353	1.64	0.0639567	55.63	12.7833	4.53353	0.717593	1181.22	5.0625	0	7104.26	872	77986	233.269	26.0896	0.780453	2.31	0.0885208	59.5046	32.3988
YulinGX	580	1761	2.29	0.0648709	43.02	13.8555	4.30932	0.358621	1318.84	4.61207	1.78448	7296.41	633	76079	234.749	24.0412	0.807005	1.04	0.107404	62.6103	17.6163
Baise	358	1334	1.79	0.0552262	49.85	12.8482	1.32325	0.597765	1144.27	3.36313	10.4944	14099.4	377	86362	230.563	23.0476	0.841461	3.17	0.120097	53.1425	27.9938
Hezhou	201	754	0.95	0.0691113	53.67	16.621	1.9286	0.427861	1201.67	4.67164	4.39801	11403.9	270	86858	241.496	23.9571	0.818686	1.35	0.123725	63.3731	34.7944
Hechi	342	928	1.17	0.053647	52.22	11.3111	0.803623	0.388889	1030.08	2.35088	3.8538	13215.7	263	85292	224.073	23.0935	0.846481	0.77	0.122947	65.8246	23.8951
Laibin	208	706	1.17	0.0573515	51.11	11.9806	2.2019	0.615385	510.706	3.33654	4.57692	10667.5	267	76582	232.923	25.7499	0.817924	1.57	0.126079	51.774	25.9057
Chongzuo	209	809	1.49	0.0610318	53.01	21.0876	1.98432	0.488038	907.549	3.70335	20.3349	13197.6	359	78189	237.666	24.0054	0.807822	1.94	0.130263	49.5024	26.3515
Luzhou	426	2157	1.78	0.0694646	44.85	14.0974	2.84532	0.474178	2251.78	6.0446	7.57277	10564.7	785	68716	238.422	29.8488	0.808344	0.65	0.283492	35.9366	14.2842
Deyang	346	2404	2.72	0.0645833	45.17	15.2356	8.34157	0.367052	1475.24	13.8468	17.0116	8945.99	1256	88437	248.401	32.7575	0.746998	0.46	0.241291	33.6965	28.757
Mianyang	487	3010	2.7	0.0858694	45.62	14.12	2.5772	0.451745	2283.41	15.6797	16.4579	9131.38	1106	84222	252.85	26.9162	0.807842	0.57	0.312393	34.54	19.9559
Guangyuan	231	1008	1.02	0.0767168	48.13	16.2592	1.41326	0.662338	1309.47	3.93939	3.81385	12534.1	543	79873	232.503	25.9534	0.825753	1.02	0.275943	52.9784	18.3283
Suining	282	1403	1.44	0.0842636	46.73	15.6128	6.03083	0.347518	1500.04	7.62766	2.19149	9533.36	595	68864	233.138	31.1067	0.758717	0.31	0.717215	33.1915	27.6178
Neijiang	314	1466	1.07	0.0706701	42.21	17.1267	5.34776	0.305732	1368.76	6.57325	6.38535	8807.26	414	67573	235.256	33.8534	0.750347	1.63	0.131924	32.9586	17.1016
Leshan	316	2003	1.78	0.0617769	47.45	18.2809	2.82572	0.341772	1514.45	6.41139	8.13291	10069.6	622	87663	246.429	28.1096	0.828027	1.7	0.202383	31.4082	17.918
Nanchong	561	2401	2.35	0.0641496	44.6	14.1118	4.43114	0.4082	2000.51	4.77718	8.69875	10231.3	806	83013	236.104	31.4309	0.775317	0.32	0.246066	43.426	16.1382
Meishan	296	1424	1.85	0.0643562	52.54	14.92	5.36862	0.155405	1324.92	6.72635	7.26351	9308.84	679	82096	244.012	31.387	0.749068	0.73	0.178185	36.4257	19.3714
Yibin	459	2802	2.02	0.0749104	44.88	14.6759	3.39052	0.300654	2353.1	8.72113	3.96732	12120	868	87304	241.195	32.3992	0.800256	0.76	0.244517	47.2505	14.2724
Ya'an	143	755	0.77	0.0695918	48.63	17.1043	1.25415	0.727273	1268.31	6.67133	22.8601	11860.7	350	77965	236.949	21.0623	0.861645	0.77	0.353835	43.2028	46.3481
Bazhong	271	767	0.78	0.0598828	45.43	13.5342	1.22165	0.564576	1311.1	3.89299	1	11463	321	73449	222.673	26.7273	0.837858	0.82	0.117463	60.5867	19.3665
Ziyang	231	808	0.98	0.0726166	48.05	15.5667	3.34239	0.679654	1196.71	3.48052	2.37662	8802.18	250	78205	229.381	31.5457	0.757363	0.46	0.234871	30.0736	26.6874
Liupanshui	303	1340	1.46	0.0509552	40.84	12.0957	3.49244	0.273927	1433.27	6.27063	3.61056	10692.7	320	89001	236.168	21.5899	0.822685	5.03	0.130207	53.2937	29.8907
Zunyi	661	3720	3.41	0.0533441	43.55	13.36	2.58351	0.358548	2185.41	9.28896	6.52496	11442.8	738	10216	242.377	23.2344	0.839984	1.1	0.17799	47.9032	27.2405
Anshun	247	967	1.36	0.0541562	45.5	28.3602	3.79218	0.295547	1485.27	6.91093	4.7085	11982.5	354	82795	237.243	22.5141	0.804734	1.56	0.126964	56.6559	37.9431
Bijie	690	2020	1.73	0.0500197	38.15	15.3275	1.75387	0.208696	1295.27	2.55217	3.13188	10833.9	387	88442	219.318	21.6286	0.822844	3.03	0.0852464	62.8681	16.1324
Tongren	330	1328	1.43	0.0531463	48.51	13.7357	2.07627	0.606061	1216.59	6.64848	7.27576	13899.6	409	65278	233.255	23.0586	0.827533	1.2	0.590568	68.303	22.5453
Qujing	577	2959	2.14	0.064514	41.91	13.7095	2.67851	0.272097	1428.65	3.513	2.76776	9224.22	653	89052	235.574	19.7727	0.792832	1.87	0.0893371	55.2808	22.4892
Yuxi	225	2058	1.14	0.0771655	57.65	20.3803	3.24617	0.671111	2264.86	9.15111	3.88889	13403.2	428	98139	246.813	21.2132	0.788182	1.42	0.160852	46.4444	29.2416
Zhaotong	509	1289	1	0.0598484	37.57	12.5926	1.55876	0.204322	1255.45	1.23772	1.34971	12297	145	94947	219.665	21.5517	0.829071	1.47	0.0702399	57.8035	20.4721
Lijiang	126	513	0.67	0.0713515	44.11	18.3289	1.07695	0.603175	3524.41	3.47619	9.84921	13936.8	50	100632	245.109	15.0372	0.791465	0.92	0.125206	54.7619	21.6684
Pu'er	241	945	0.84	0.0774305	32.43	12.0794	0.487824	0.46888	687.608	1.91286	1.56846	13425.5	166	95620	227.633	22.1508	0.859126	1.12	0.126446	48.1701	20.7209
Lincang	226	821	0.73	0.0724612	39.82	9.04932	0.903415	0.243363	946.216	1.47788	1.71239	12251.3	177	99755	220.657	21.388	0.849932	0.91	0.0884951	54.6681	15.1499
Tongchuan	71	382	0.56	0.0643928	43.05	12.4831	4.32044	0.985915	969.843	2.80282	3.57746	18556.4	196	69120	246.913	36.0965	0.80015	4.38	0.300746	38.0563	13.9282
Baoji	332	2277	2.27	0.0671327	40.92	14.2216	2.67448	0.575301	1928.76	7.19277	5.79217	10969	844	73028	250.195	30.8359	0.825373	1.07	0.244464	36.6175	15.916
Xianyang	396	2205	3.56	0.11767	46.01	15.885	8.4719	0.568182	3338.51	11.0732	20.1338	10410.4	725	69290	253.767	40.9814	0.717157	1.23	0.220877	40.8258	4.86341
Weinan	469	1866	3.07	0.0777478	49.82	14.9199	5.49056	0.394456	1305.75	1.77186	3.46482	10315.4	575	65596	240.577	44.9254	0.698073	3.12	0.159061	42.9019	11.6776
Yan'an	228	1601	1.41	0.0748365	32.76	12.0652	3.42047	0.70614	2622.94	4.49123	4.04386	20035.5	276	79799	244.667	31.8573	0.737517	0.8	0.194802	57.7149	20.363
Hanzhong	321	1593	1.84	0.0747229	44.87	15.5179	1.39009	0.358255	2711.59	4.71963	6.85981	11569.5	728	73316	245.648	25.7915	0.862273	0.99	0.186636	45.1713	14.7501
YulinSX	363	4090	3.95	0.0910911	32.79	16.2422	5.43162	0.539945	1691.25	5.19284	4.19559	19351.8	1011	88461	247.998	32.8907	0.502975	3.48	0.128715	49.5647	26.2447
Ankang	249	1089	0.9	0.0757558	44.4	12.1017	0.880617	0.995984	752.157	3.18474	4.28112	15745.4	764	68251	240.148	26.2727	0.871868	0.41	0.0936546	44.739	16.6986
Shangluo	205	739	0.95	0.094714	44.51	15.078	0.765847	0.42439	978.922	2.2878	4.76098	14132.5	291	61124	230.042	28.5623	0.862183	1.05	0.126661	43.3707	11.8686
Jinchang	44	358	0.79	0.0510432	37.93	28.5815	1.73786	1.45455	749.667	18.5227	4.29545	13855.3	102	86195	251.697	27.8691	0.299749	3.67	0.21873	38.9318	57.6091
Baiyin	151	497	1.23	0.0697571	33.75	12.417	1.1701	2.16556	1672.08	6.25166	1.29801	13363.1	169	75745	238.201	30.5419	0.386315	4.71	0.10837	70.1325	29.714
Tianshui	298	667	1.25	0.128876	32.66	13.6148	1.86179	0.338926	1522.29	3.20805	6.82886	11809.7	163	68500	223.584	23.6762	0.746598	1.48	0.085301	59.7617	17.2331
Wuwei	146	526	1.32	0.085243	35.15	12.035	0.724341	0.60274	579.078	0.465753	6.80822	14866.4	185	75582	228.957	29.4157	0.310368	1.28	0.16803	62.9178	19.3499
Zhangye	113	467	1.28	0.0406678	39.12	22.7281	0.574503	0.619469	1631.29	19.3982	10.3717	15892.3	184	85779	244.803	24	0.362874	1.45	0.118758	51.8142	20.575
Pingliang	184	476	0.85	0.0717735	33.37	15.9977	1.97744	0.586957	1113.94	0.320652	5.05435	13182.1	84	86228	226.5	27.8903	0.741475	5.66	0.120666	68.5978	24.3288
Jiuquan	106	658	1.84	0.0660667	41.26	17.4885	0.269115	0.90566	1222.14	0.273585	4.66981	14664.1	233	80752	263.505	30.7469	0.117584	1.5	0.1848	43.6509	21.6067
Qingyang	218	755	0.86	0.0906782	34.74	13.692	3.7284	0.399083	1287.35	4.70183	4.94037	13802.5	96	80521	227.619	29.7281	0.641871	0.86	0.0423005	65.8991	33.4615
Dingxi	252	441	1.16	0.0771778	31.34	20.1305	1.29606	0.357143	1009	3.24206	0	11458.4	118	75289	221.397	25.4386	0.670903	1.83	0.0438627	51.7778	15.3345
Longnan	240	452	0.75	0.103748	35.28	10.9896	0.759217	0.4875	1103.8	1.6875	1.93333	13957.4	75	69164	219.666	21.1806	0.822913	1.73	0.0349171	63.4875	12.2192
Haidong	136	514	0.79	0.0760729	34.74	12.3435	2.43446	0.397059	850.176	2.28676	0	10375.2	87	72108	202.912	26.5958	0.636039	2.77	0.0769765	55.6618	29.3263
Yinchuan	286	1964	3.64	0.0659605	38.83	16.282	14.4273	0.800699	3210.98	22.5175	26.7028	11621	365	105653	269.305	35.6044	0.417938	6.9	0.36189	30.8147	19.0427
Shizuishan	75	542	1.94	0.0324	36.7	28.7298	6.5043	1.02667	612.608	14.0133	9.18667	16180.4	318	91602	237.116	36.2574	0.422668	6.88	0.408728	39.88	42.8663
Wuzhong	138	622	1.82	0.0489965	35.99	23.3262	3.28495	1.22464	693.608	8.6087	3.06522	16867.8	339	100167	225.009	32.34	0.37759	6.04	0.19706	53.7536	25.8033
Guyuan	114	352	0.83	0.043591	30.85	33.6147	1.95038	0.868421	654.078	3.51754	3.33333	22248.8	60	110060	210.846	26.4531	0.663953	1.83	0.0903921	69.0614	33.6273
Zhongwei	107	440	0.93	0.041073	34.6	24.7082	2.32406	0.738318	931.902	6.96262	0	16979.3	158	102042	221.877	32.048	0.386066	5.87	0.180172	51.6822	36.6349
Karamay	46	887	1.44	0.0375271	38.82	13.7823	8.3448	4.08696	1283.88	16.7609	15.7609	24302	97	129545	273.368	33.4865	0.217011	1.73	0.676863	46.4783	39.2633
Kumul	67	608	0.97	0.0398869	38.03	18.9358	0.326927	0.328358	576.235	5.41791	3.71642	19612.3	148	92265	254.943	30.7406	0.113453	10.52	0.282878	58.0597	25.9959
