# Supplementary material for: Bridging carbon footprint and urban livability differences in Chinese non-core cities: a typological exploration
Source: Research Square preprint supplement (doi:10.21203/rs.3.rs-3993809/v1), 2024-03-05
Supplement: Supplementary file 4 [file 9641be9fc5b86ea256ff71e5.xlsx]

## Sheet: Sheet1
city_name	weighted performance
Tangshan	0.284865
Qinhuangdao	0.203426
Handan	0.216693
Baoding	0.238829
Zhangjiakou	0.170926
Chengde	0.166046
Cangzhou	0.21602
Langfang	0.259894
Hengshui	0.155567
Datong	0.155385
Changzhi	0.150571
Jincheng	0.136828
Jinzhong	0.194718
Yuncheng	0.144477
Xinzhou	0.140117
Linfen	0.142667
Lvliang	0.131836
Baotou	0.246974
Wuhai	0.192843
Chifeng	0.153636
Tongliao	0.141939
Ordos	0.258304
Hulunbuir	0.174569
Bayannur	0.13463
Ulanqab	0.177655
Anshan	0.170844
Fushun	0.15153
Benxi	0.167983
Dandong	0.133483
Jinzhou	0.154961
Yingkou	0.171481
Fuxin	0.131463
Liaoyang	0.154999
Panjin	0.194583
Tieling	0.112311
Chaoyang	0.110019
Huludao	0.142181
Jilin	0.175679
Siping	0.145382
Liaoyuan	0.114183
Tonghua	0.161618
Baishan	0.13954
Songyuan	0.109859
Baicheng	0.130358
Qiqihar	0.155433
Shuangyashan	0.113992
Daqing	0.178201
YichunHLJ	0.175891
Jiamusi	0.141694
Qitaihe	0.115134
Mudanjiang	0.135728
Wuxi	0.532436
Xuzhou	0.325344
Changzhou	0.431779
SuzhouJS	0.737826
Nantong	0.387121
Lianyungang	0.244281
Huai'an	0.247897
Yancheng	0.294964
Yangzhou	0.357795
Zhenjiang	0.361666
TaizhouJS	0.31825
Suqian	0.23812
Wenzhou	0.391164
Jiaxing	0.43474
Huzhou	0.334453
Shaoxing	0.374301
Jinhua	0.342559
Quzhou	0.260041
Zhoushan	0.309146
TaizhouZJ	0.345378
Lishui	0.245446
Wuhu	0.286613
Bengbu	0.198917
Huainan	0.165202
Ma'anshan	0.2452
Huaibei	0.183477
Tongling	0.194319
Anqing	0.196973
Huangshan	0.203728
Chuzhou	0.222553
Fuyang	0.209784
SuzhouAH	0.164729
Lu'an	0.180406
Bozhou	0.166519
Chizhou	0.16571
Xuancheng	0.193025
Putian	0.214614
Sanming	0.196873
Quanzhou	0.40447
Zhangzhou	0.251459
Nanping	0.167736
Longyan	0.191914
Ningde	0.17772
Jingdezhen	0.20476
Pingxiang	0.194014
Xinyu	0.201851
Yingtan	0.175317
Ganzhou	0.252033
Ji'an	0.200824
YichunJX	0.218038
FuzhouJX	0.193506
Shangrao	0.208081
Zibo	0.254651
Zaozhuang	0.185697
Dongying	0.260093
Yantai	0.307117
Weifang	0.316643
Jining	0.25903
Tai'an	0.209408
Weihai	0.28671
Rizhao	0.189257
Linyi	0.284521
Dezhou	0.215994
Liaocheng	0.196136
Binzhou	0.237212
Heze	0.214394
Kaifeng	0.185993
Luoyang	0.246767
Pingdingshan	0.164722
Anyang	0.182254
Hebi	0.154932
Xinxiang	0.218775
Jiaozuo	0.205273
Puyang	0.163358
Xuchang	0.203823
Luohe	0.164583
Sanmenxia	0.144928
Nanyang	0.203998
Shangqiu	0.195342
Xinyang	0.179607
Zhoukou	0.184778
Zhumadian	0.184218
Huangshi	0.204217
Shiyan	0.175265
Xiangyang	0.209082
Ezhou	0.194921
Jingmen	0.155484
Xiaogan	0.167134
Jingzhou	0.18576
Huanggang	0.182327
Xianning	0.181715
Suizhou	0.119282
Zhuzhou	0.218372
Xiangtan	0.200784
Hengyang	0.194745
Shaoyang	0.169098
Yueyang	0.185994
Changde	0.187872
Zhangjiajie	0.132435
Yiyang	0.156903
Chenzhou	0.169271
Yongzhou	0.166911
Huaihua	0.144185
Loudi	0.14795
Shaoguan	0.26312
Zhuhai	0.454239
Shantou	0.276088
Foshan	0.503263
Jiangmen	0.270675
Zhanjiang	0.206374
Maoming	0.186241
Zhaoqing	0.216886
Huizhou	0.297956
Meizhou	0.181716
Shanwei	0.164176
Heyuan	0.165987
Yangjiang	0.18871
Qingyuan	0.174883
Dongguan	0.562651
Zhongshan	0.392358
Chaozhou	0.225886
Jieyang	0.20487
Yunfu	0.150738
Liuzhou	0.2031
Wuzhou	0.146634
Beihai	0.182815
Fangchenggang	0.16355
Qinzhou	0.136727
Guigang	0.145687
YulinGX	0.146817
Baise	0.156728
Hezhou	0.14371
Hechi	0.135632
Laibin	0.123194
Chongzuo	0.170838
Luzhou	0.159519
Deyang	0.195619
Mianyang	0.201806
Guangyuan	0.143998
Suining	0.166866
Neijiang	0.127876
Leshan	0.151188
Nanchong	0.169965
Meishan	0.144371
Yibin	0.16731
Ya'an	0.186985
Bazhong	0.121377
Ziyang	0.119399
Liupanshui	0.137335
Zunyi	0.187727
Anshun	0.165624
Bijie	0.144825
Tongren	0.185713
Qujing	0.152187
Yuxi	0.172939
Zhaotong	0.12287
Lijiang	0.158375
Pu'er	0.108486
Lincang	0.101832
Tongchuan	0.128649
Baoji	0.155453
Xianyang	0.199766
Weinan	0.136831
Yan'an	0.157165
Hanzhong	0.154737
YulinSX	0.183677
Ankang	0.133143
Shangluo	0.115121
Jinchang	0.165999
Baiyin	0.137727
Tianshui	0.121902
Wuwei	0.115448
Zhangye	0.161921
Pingliang	0.122074
Jiuquan	0.126137
Qingyang	0.12754
Dingxi	0.102427
Longnan	0.104077
Haidong	0.0917069
Yinchuan	0.239115
Shizuishan	0.184899
Wuzhong	0.149767
Guyuan	0.158828
Zhongwei	0.133627
Karamay	0.260895
Kumul	0.133048
