# Supplementary material for: Bridging carbon footprint and urban livability differences in Chinese non-core cities: a typological exploration
Source: Research Square preprint supplement (doi:10.21203/rs.3.rs-3993809/v1), 2024-03-05
Supplement: Supplementary file 5 [file e6b3c38b5fac9312bd0fe245.xlsx]

## Sheet: Sheet1
Population concentration 0.049503
Economic strength 0.084781
Space for development 0.073696
Housing affordability 0.006006
Housing supply 0.019821
Housing environment 0.035429
Daily life vitality 0.110561
Cultural vitality 0.093111
Informational visibility 0.049258
Practical innovation 0.107640
Education for innovation 0.053517
Innovation support 0.046406
Potential of employment 0.131568
Income of employment 0.004463
Entrepreneurial environment 0.018753
Environment quality 0.022696
Ecology quality 0.007355
Energy efficiency 0.004499
Social welfare guarantee 0.038949
Basic education support 0.020817
Urban infrastructure condition 0.021170
