# Supplementary material for: Bridging carbon footprint and urban livability differences in Chinese non-core cities: a typological exploration
Source: Research Square preprint supplement (doi:10.21203/rs.3.rs-3993809/v1), 2024-03-05
Supplement: Supplementary file 6 [file eaecf52bfd98948a0847c1cb.xlsx]

## Sheet: Sheet1
city_name	Population concentration	Economic strength	Space for development	Housing affordability	Housing supply	Housing environment	Daily life vitality	Cultural vitality	Informational visibility	Practical innovation	Education for innovation	Innovation support	Potential of employment	Income of employment	Entrepreneurial environment	Environment quality	Ecology quality	Energy efficiency	Social welfare guarantee	Basic education support	Urban infrastructure condition	Cluster
Tangshan	0.591389	0.350882	0.392748	0.629573	0.230869	0.247564	0.312489	0.0998374	0.265767	0.134608	0.339512	0.220154	0.150802	0.605611	0.453785	0.353406	0.67559	0.67734	0.428198	0.475786	0.296886	3
Qinhuangdao	0.219334	0.0741334	0.0909091	0.525423	0.242575	0.283915	0.151068	0.0530442	0.379694	0.127782	0.540127	0.171806	0.0319831	0.631808	0.467002	0.500161	0.775751	0.786535	0.42942	0.588233	0.247081	3
Handan	0.728676	0.171859	0.202758	0.505847	0.287449	0.254096	0.224513	0.0131949	0.405471	0.0654367	0.150005	0.0697938	0.116878	0.510622	0.385558	0.0569924	0.775212	0.699507	0.202576	0.96347	0.286304	3
Baoding	0.902518	0.187738	0.28856	0.576342	0.431173	0.131382	0.188784	0.0149	0.234515	0.103839	0.308057	0.166661	0.134599	0.548224	0.426889	0.290131	0.80526	0.867816	0.162407	0.608017	0.356241	4
Zhangjiakou	0.298944	0.0698257	0.130235	0.678272	0.18101	0.0607233	0.0443746	0.033689	0.303054	0.0561636	0.246285	0.370499	0.0339241	0.53417	0.393526	0.711023	0.741535	0.792282	0.356055	0.562021	0.30498	3
Chengde	0.236393	0.0673212	0.0801839	0.623126	0.220247	0.362721	0.0312355	0.023863	0.150646	0.0584471	0.299313	0.278857	0.0294515	0.533927	0.344399	0.725426	0.878335	0.718391	0.312461	0.74188	0.327616	2
Cangzhou	0.557271	0.175015	0.201736	0.566075	0.233037	0.121355	0.251574	0.0325994	0.235591	0.11393	0.17935	0.139833	0.172996	0.592387	0.351213	0.179432	0.71068	0.903941	0.21127	0.743313	0.309173	3
Langfang	0.410236	0.155029	0.226251	0.584808	0.327336	0.197382	0.446621	0.0584824	0.194297	0.165257	0.48846	0.214994	0.098903	0.690838	0.661623	0.239675	0.707447	0.931856	0.251281	0.691466	0.328465	4
Hengshui	0.306255	0.0678221	0.109295	0.638034	0.337958	0.214768	0.150104	0.0184859	0.153854	0.101889	0.0869142	0.135818	0.0783122	0.491104	0.396303	0.121039	0.856953	0.924466	0.191785	0.697277	0.260935	4
Datong	0.216084	0.0583049	0.0893769	0.798517	0.175808	0.226493	0.110997	0.0316087	0.162125	0.056803	0.158874	0.241961	0.0264979	0.544118	0.402877	0.635713	0.680643	0.747947	0.343425	0.606072	0.261925	3
Changzhi	0.222583	0.0754358	0.0663943	0.586452	0.378279	0.193185	0.119155	0.0653148	0.107201	0.065645	0.219012	0.239193	0.0377215	0.511946	0.419477	0.360718	0.828712	0.715107	0.271557	0.396003	0.214557	3
Jincheng	0.142161	0.06111	0.0377937	0.616305	0.318448	0.275006	0.108182	0.0678321	0.0904087	0.046694	0.0543484	0.260548	0.0316456	0.529854	0.564037	0.328801	0.830491	0.786535	0.323735	0.353158	0.242587	3
Jinzhong	0.23883	0.0632639	0.066905	0.694463	0.245177	0.162462	0.10768	0.0729152	0.0588674	0.0660232	1	0.213515	0.0637975	0.538453	0.489822	0.409869	0.785837	0.730706	0.27558	0.390755	0.399997	3
Yuncheng	0.351747	0.0720297	0.127681	0.738905	0.404726	0.140015	0.0939254	0.0268124	0.135275	0.0486678	0.183602	0.0851511	0.0470042	0.461757	0.454215	0.190577	0.752782	0.615764	0.177703	0.654288	0.265932	3
Xinzhou	0.182778	0.0415247	0.0515832	0.709033	0.161067	0.193828	0.0581319	0.0320534	0.12808	0.0251758	0.1541	0.347221	0.0361181	0.496091	0.357613	0.581634	0.742869	0.756158	0.217978	0.698066	0.372096	3
Linfen	0.286759	0.0650671	0.0771195	0.707128	0.313028	0.178092	0.0714073	0.0577558	0.108376	0.0346564	0.23396	0.181386	0.0379747	0.510396	0.43671	0.346828	0.791941	0.649425	0.21409	0.670171	0.135074	3
Lvliang	0.239643	0.0667201	0.0847804	0.8609	0.137654	0.162014	0.0843785	0.0350142	0.0892927	0.0373179	0.0826995	0.286982	0.0454008	0.558875	0.359341	0.495207	0.743066	0.562397	0.163784	0.554565	0.156686	3
Baotou	0.184403	0.129283	0.136874	0.737841	0.227834	0.217972	0.0361223	0.813702	0.137242	0.0120364	0.545562	0.303403	0.0345992	0.637875	0.513899	0.70113	0.319229	0.667488	0.537566	0.223338	0.24327	3
Wuhai	0.00974817	0.0178822	0.0556691	0.892392	0.316063	0.451954	0.290354	0.140521	0.0669921	0.0949368	0.1556	0.562409	0.00911392	0.654108	0.52709	0.497234	0.166696	0.293924	0.453045	0.197114	0.774116	3
Chifeng	0.292445	0.0779904	0.138407	0.66434	0.202471	0.375221	0.0141877	0.0464597	0.131217	0.0325457	0.150197	0.353897	0.0186498	0.584066	0.247928	0.807028	0.643765	0.710181	0.122207	0.561957	0.392705	3
Tongliao	0.1974	0.0536466	0.15526	0.786917	0.19987	0.403759	0.0143981	0.040741	0.114195	0.00138019	0.142015	0.28054	0.015443	0.59786	0.202574	0.668565	0.67918	0.522989	0.237891	0.58771	0.419726	3
Ordos	0.139724	0.1667	0.181307	0.807918	0.352699	0.942047	0.0314105	0.138549	0.249902	0.116336	0.15464	1	0.0344304	0.776735	0.483324	0.608311	0.292082	0.527915	0.31201	0.691818	0.984502	3
Hulunbuir	0.146223	0.0483871	0.187436	0.867617	0.22003	0.211229	0	0.0771649	0.19673	0.0122145	0.233682	0.589834	0.00725738	0.574772	0.303296	0.963235	0.849277	0.551724	0.454199	0.45361	0.347626	3
Bayannur	0.0893582	0.0334602	0.0822268	0.851955	0.314546	0.0808684	0.00447	0.0524325	0.0959768	0.0512994	0.131615	0.54839	0.0180591	0.615039	0.367016	0.620337	0.210719	0.765189	0.316328	0.292297	0.44847	3
Ulanqab	0.102356	0.031106	0.09857	0.867192	0.190548	0.833999	0.0137085	0.0327628	0.125596	0	0.238826	0.67004	0.0193249	0.59574	0.262856	0.7705	0.425815	0.361248	0.403935	0.36999	0.647878	3
Anshan	0.233956	0.0767882	0.114402	0.859265	0.226967	0.158265	0.134562	0.105754	0.145291	0.102617	0.192565	0.157063	0.055443	0.509323	0.390791	0.517506	0.904001	0.642036	0.496103	0.19884	0.325609	3
Fushun	0.115353	0.0311561	0.046476	0.842109	0.189248	0.123718	0.0553927	0.0562296	0.104255	0.0927106	0.333024	0.179671	0.0177215	0.54214	0.395912	0.625843	0.969876	0.740558	0.696503	0.222949	0.250901	3
Benxi	0.0714866	0.0302545	0.0255363	0.798918	0.174073	0.0730896	0.0690487	0.141359	0.0676081	0.0684302	0.494135	0.261646	0.0145992	0.457902	0.333086	0.667424	0.975404	0.428571	0.843697	0.223486	0.33564	3
Dandong	0.141348	0.0287017	0.0434116	0.675115	0.209625	0.111825	0.0363358	0.0419533	0.185016	0.0873242	0.210426	0.189134	0.0275949	0.43008	0.364667	0.659167	0.938403	0.84647	0.333996	0.293334	0.237709	3
Jinzhou	0.183591	0.0433781	0.0643514	0.794606	0.264253	0.150346	0.0975537	0.0641231	0.151664	0.0600585	0.564889	0.184811	0.0243038	0.512734	0.300766	0.45528	0.775317	0.531199	0.398772	0.265025	0.095255	3
Yingkou	0.153534	0.0560509	0.132278	0.835545	0.258617	0.107634	0.225991	0.0725835	0.0997275	0.0893562	0.163275	0.200823	0.0531646	0.521994	0.378839	0.501135	0.78419	0.640394	0.497777	0.172952	0.550344	3
Fuxin	0.0982941	0.014977	0.0485189	0.877037	0.23217	0.118218	0.0391375	0.0248123	0.0985405	0.0565291	0.361441	0.19727	0.0135021	0.447955	0.232674	0.548878	0.794774	0.7578	0.451869	0.317221	0.357376	3
Liaoyang	0.0942323	0.031657	0.0434116	0.896562	0.247561	0.0997128	0.206589	0.0737576	0.0766663	0.0705999	0.214091	0.244129	0.0167089	0.52941	0.313067	0.4472	0.887268	0.655993	0.66	0.230221	0.292776	2
Panjin	0.0706742	0.054999	0.0806946	0.865111	0.360503	0.207412	0.30619	0.0851997	0.101509	0.105634	0.129658	0.496651	0.0214346	0.491431	0.482025	0.430486	0.77218	0.912972	0.618511	0.334542	0.376806	3
Tieling	0.157595	0.0228912	0.0515832	0.898425	0.182528	0.13293	0.057515	0.0176301	0.0728373	0.0506432	0.166478	0.135024	0.0209283	0.514259	0.200874	0.481953	0.9196	0.553366	0.336755	0.353287	0.158288	3
Chaoyang	0.1974	0.0335604	0.0526047	0.804355	0.200303	0.277336	0.0500952	0.0270284	0.0160336	0.049747	0.0495017	0.190514	0.023038	0.483361	0.122897	0.593824	0.764246	0.674056	0.162855	0.506007	0.127902	3
Huludao	0.161657	0.0282509	0.0740552	0.78341	0.24431	0.304894	0.085667	0.0370816	0.157891	0.0682661	0.0791226	0.155358	0.018481	0.486495	0.271465	0.534763	0.795334	0.743842	0.339072	0.430196	0.627922	3
Jilin	0.258327	0.0624624	0.116956	0.70257	0.203122	0.1653	0.0383025	0.108271	0.152937	0.0555194	0.495631	0.233564	0.0316456	0.515524	0.366422	0.582979	0.96826	0.729885	0.490153	0.298075	0.350356	3
Siping	0.111292	0.0160789	0.0628192	0.824463	0.203772	0.081034	0.059305	0.0298637	0.0840943	0.0402165	0.398389	0.312479	0.0101266	0.476984	0.185967	0.478553	0.881895	0.591133	0.46072	0.959233	0.16625	3
Liaoyuan	0.0454915	0.0112202	0.00715015	0.814379	0.171472	0.106852	0.0638254	0.0470737	0.0358749	0.0347369	0.104816	0.295089	0.00455696	0.472534	0.23631	0.521262	0.932103	0.816913	0.455658	0.599867	0.112987	3
Tonghua	0.0698619	0.027199	0.0495403	0.780006	0.197702	0.228126	0.0374458	0.0602838	0.0614714	0.0521071	0.180441	0.631496	0.0238819	0.460156	0.30043	0.666649	0.973699	0.661741	0.770836	0.53358	0.0441816	3
Baishan	0.0414297	0.0151773	0.0275792	0.853293	0.184262	0.0325804	0.0192746	0.123147	0.0094349	0.0243123	0.0814202	0.610357	0.00919831	0.442524	0.309951	0.766347	0.987268	0.8867	0.725025	0.284826	0.144916	3
Songyuan	0.147035	0.0273993	0.0444331	0.860473	0.20594	0.112088	0.0395658	0.0385931	0.0579055	0.0241211	0.0503734	0.270943	0.0134177	0.549749	0.145623	0.546774	0.804344	0.883415	0.259868	0.544653	0.206263	3
Baicheng	0.0901706	0.0152274	0.0526047	0.846802	0.237806	0.139844	0.0183859	0.0335322	0.0545007	0.0317023	0.0329969	0.473649	0.00894515	0.4977	0.167217	0.68783	0.711121	0.78243	0.40055	0.670255	0.497177	3
Qiqihar	0.292445	0.0497896	0.138407	0.789372	0.191199	0.243722	0.0232775	0.0618097	0.311456	0.0519199	0.300238	0.265714	0.0254008	0.496476	0.203285	0.740543	0.904751	0.76601	0.216072	0.201751	0.133109	4
Shuangyashan	0.0617384	0.014426	0.0449438	0.957486	0.209408	0.162934	0.0170357	0.04767	0.0607132	0.00014861	0.0986596	0.341047	0.00860759	0.452958	0.235271	0.780849	0.963041	0.672414	0.493358	0.145655	0.125029	3
Daqing	0.190089	0.104939	0.170582	0.909738	0.260134	0.184029	0.0926584	0.0571291	0.139126	0.115286	0.412241	0.225177	0.0371308	0.719624	0.461367	0.638631	0.758187	0.902299	0.276371	0.129661	0.401611	3
YichunHLJ	0.034931	0.00440793	0.0434116	0.717629	0.210709	1	0.00449159	0.159148	0.077351	0.0396915	0.0653195	0.670943	0.00109705	0.336071	0.263123	0.913104	1	0.659278	0.432315	0.373275	0.302866	3
Jiamusi	0.138911	0.0303546	0.0715015	0.77771	0.225233	0.19815	0.0230369	0.039419	0.205843	0.0495811	0.379147	0.382516	0.0227004	0.398235	0.333148	0.755346	0.92686	0.882594	0.150605	0.163523	0.135616	4
Qitaihe	0.0203087	0	0.011236	0.904214	0.178409	0.208659	0.0551126	0.0490095	0.0418173	0.0548467	0.0764112	0.474958	0.00438819	0.441158	0.208883	0.77503	0.94197	0	0.343004	0.238236	0.136534	3
Mudanjiang	0.149472	0.0313564	0.0791624	0.782837	0.209842	0.0617125	0.0138998	0.0514883	0.138299	0.0369724	0.407101	0.240678	0.0199156	0.454617	0.391866	0.803391	0.975696	0.895731	0.204179	0.225149	0.218854	4
Wuxi	0.570268	0.609297	0.459142	0.527541	0.433341	0.198086	0.699018	0.139008	0.640531	0.74699	0.29709	0.398762	0.587004	0.884378	0.923588	0.531051	0.638658	0.954844	0.762546	0.253848	0.416604	3
Xuzhou	0.701868	0.356341	0.38713	0.607622	0.538045	0.288952	0.28534	0.0439005	0.646075	0.276359	0.320544	0.159968	0.166582	0.636241	0.733055	0.168286	0.782041	0.920361	0.294074	0.706004	0.33804	3
Changzhou	0.393176	0.380635	0.27477	0.53442	0.472361	0.194529	0.585281	0.107705	0.499699	0.718414	0.421964	0.293353	0.423207	0.863638	0.950624	0.474553	0.656319	0.945813	0.425319	0.288911	0.361756	2
SuzhouJS	1	1	1	0.271218	0.386516	0.109642	0.758754	0.227784	1	1	0.344261	0.459795	1	0.867585	1	0.5819	0.517637	0.948276	0.636047	0.339077	0.359423	3
Nantong	0.592201	0.492386	0.327886	0.357064	0.705181	0.339589	0.421883	0.0973748	0.370077	0.363866	0.230881	0.302667	0.448523	0.689908	0.843956	0.600884	0.638164	0.985222	0.278113	0.136689	0.466519	3
Lianyungang	0.337937	0.153827	0.171604	0.630913	0.623672	0.212239	0.29635	0.0799473	0.43147	0.160388	0.171239	0.174691	0.078903	0.685433	0.728535	0.378904	0.76278	0.900657	0.297767	0.797888	0.407379	3
Huai'an	0.334687	0.191294	0.193565	0.592911	0.54173	0.208149	0.176686	0.103533	0.311364	0.236544	0.30491	0.239454	0.121181	0.611754	0.714031	0.394801	0.793815	0.967159	0.252355	0.622092	0.367273	3
Yancheng	0.509342	0.287868	0.28907	0.566886	0.475179	0.227434	0.206928	0.0913429	0.343322	0.294273	0.189097	0.324742	0.260675	0.666317	0.688426	0.533255	0.761194	0.975369	0.21325	0.417906	0.412122	3
Yangzhou	0.334687	0.292627	0.221655	0.421175	0.540429	0.369672	0.330054	0.135701	0.435027	0.573353	0.428079	0.33082	0.252236	0.650789	0.81345	0.455283	0.771021	0.96798	0.46512	0.223354	0.412929	3
Zhenjiang	0.22502	0.201062	0.167518	0.636102	0.538261	0.30142	0.549416	0.208714	0.283893	0.566523	0.643224	0.367722	0.165485	0.694827	0.84723	0.46452	0.723713	0.91133	0.343526	0.250094	0.473405	3
TaizhouJS	0.331438	0.25581	0.198161	0.571023	0.687188	0.247368	0.440741	0.0781967	0.250224	0.413313	0.237482	0.298667	0.237215	0.634615	0.789888	0.483819	0.726331	0.965517	0.40135	0.213816	0.507212	3
Suqian	0.369618	0.153076	0.198672	0.549264	0.411663	0.263517	0.210382	0.044808	0.312868	0.256469	0.0862352	0.212425	0.170042	0.573884	0.685861	0.31795	0.776382	0.971264	0.176835	0.730519	0.439269	1
Wenzhou	0.743298	0.333851	0.222165	0.182051	0.358985	0.119614	0.317213	0.16264	0.416327	0.499503	0.217146	0.166552	0.563207	0.725381	0.882275	0.85603	0.776102	0.979475	0.468981	0.366407	0.192999	3
Jiaxing	0.403737	0.265678	0.297242	0.593383	0.571862	0.211446	0.708499	0.222693	0.296152	0.593223	0.241831	0.268712	0.532827	0.816214	0.912853	0.637798	0.57878	0.962233	0.483493	0.169038	0.412621	3
Huzhou	0.238018	0.15002	0.11287	0.656826	0.622155	0.294192	0.400802	0.113164	0.362405	0.482298	0.179871	0.319113	0.315781	0.732462	0.866533	0.650292	0.762095	0.937603	0.686743	0.179842	0.460223	2
Shaoxing	0.393989	0.290272	0.21859	0.192577	0.619337	0.189502	0.339703	0.152787	0.2522	0.617251	0.348476	0.245709	0.380675	0.633719	0.844767	0.746246	0.803844	0.956486	0.662037	0.211338	0.33727	3
Jinhua	0.537774	0.225306	0.249745	0.343527	0.481249	0.117934	0.296869	0.0823577	0.174387	0.551787	0.256325	0.135427	0.386414	0.723822	0.976944	0.775529	0.837751	0.937603	0.493639	0.297998	0.395394	3
Quzhou	0.149472	0.0717792	0.0766088	0.525402	1	0.25088	0.117943	0.183299	0.367039	0.263661	0.105375	0.560028	0.0912236	0.958602	0.798277	0.800105	0.869808	0.83087	0.550105	0.379112	0.56617	2
Zhoushan	0.058489	0.0654178	0.03524	0.537321	0.43811	0.232682	0.588685	0.23694	0.309918	0.221606	0.39981	0.842999	0.0287764	0.823597	0.825456	0.800426	0.464461	0.922003	0.780083	0.238109	0.338031	3
TaizhouZJ	0.502843	0.253306	0.21808	0.326063	0.503143	0.180991	0.311894	0.151445	0.356643	0.482051	0.101427	0.16028	0.384895	0.679558	0.816698	0.836942	0.754538	0.972085	0.540783	0.325105	0.375602	3
Lishui	0.168156	0.0668203	0.0536261	0.79706	0.542597	0.105202	0.0571918	0.13425	0.208975	0.424249	0.161629	0.594997	0.0976371	0.882996	0.761237	0.874045	0.91975	0.969622	0.520811	0.425914	0.283991	1
Wuhu	0.260764	0.17767	0.157814	0.621648	0.36202	0.147456	0.269637	0.0605351	0.535207	0.3324	0.643531	0.27458	0.145738	0.614913	0.8152	0.54581	0.76551	0.890805	0.344962	0.248527	0.390323	2
Bengbu	0.232331	0.0940192	0.0822268	0.722323	0.445697	0.187863	0.162065	0.0837183	0.347902	0.125096	0.329583	0.131829	0.0853165	0.585658	0.532878	0.2882	0.851885	0.964696	0.283543	0.607499	0.416455	3
Huainan	0.210398	0.056652	0.0720123	0.879677	0.363321	0.181313	0.1815	0.0220571	0.140121	0.0983315	0.339467	0.116485	0.0567932	0.72451	0.492526	0.305257	0.838602	0.697044	0.274401	0.491615	0.259453	3
Ma'anshan	0.139724	0.0992286	0.078141	0.744911	0.350748	0.210156	0.268369	0.114808	0.232378	0.332439	0.514784	0.231073	0.0914768	0.689472	0.671946	0.515287	0.761128	0.793924	0.434779	0.279382	0.380138	3
Huaibei	0.124289	0.0457323	0.052094	0.742445	0.492738	0.304031	0.299407	0.0474127	0.105277	0.135863	0.362346	0.108968	0.0497046	0.631397	0.476427	0.191383	0.834433	0.805419	0.354265	0.471879	0.321984	3
Tongling	0.0706742	0.0399719	0.0362615	0.759866	0.42662	0.218979	0.158984	0.213561	0.101239	0.166505	0.381986	0.300611	0.037384	0.629487	0.580788	0.547963	0.767455	0.628079	0.376401	0.369123	0.346952	2
Anqing	0.303006	0.113304	0.0970378	0.713883	0.550184	0.228719	0.0750081	0.0797222	0.233588	0.120166	0.158915	0.202817	0.134515	0.58027	0.512813	0.637323	0.829765	0.94335	0.233329	0.399505	0.553883	3
Huangshan	0.0722989	0.0322581	0.031665	0.709397	0.658357	0.337097	0.0219998	0.0980406	0.540983	0.106455	0.301706	0.366235	0.041097	0.608913	0.604457	0.827897	0.926796	0.981117	0.347811	0.350277	0.599844	1
Chuzhou	0.288383	0.141555	0.198161	0.770259	0.329504	0.374739	0.137334	0.0541036	0.217844	0.198714	0.239276	0.203682	0.153586	0.612299	0.579768	0.439416	0.854684	0.933498	0.18337	0.307163	0.700594	2
Fuyang	0.630382	0.130184	0.179265	0.735999	0.651203	0.309311	0.233047	0.0121109	0.346762	0.0795977	0.0925957	0.0614652	0.135612	0.568563	0.447193	0.215637	0.804605	0.95977	0.0622911	0.543253	0.380843	4
SuzhouAH	0.397238	0.0921158	0.107252	0.743441	0.554086	0.322422	0.147434	0.0190694	0.148854	0.0705065	0.079135	0.100232	0.0811814	0.536098	0.370437	0.211717	0.84327	0.948276	0.0770888	0.544176	0.518251	3
Lu'an	0.320877	0.073332	0.133299	0.80039	0.4845	0.244459	0.0859317	0.0255367	0.203843	0.112485	0.16217	0.199927	0.083038	0.653915	0.60194	0.53934	0.879598	0.971264	0.120186	0.488649	0.489392	4
Bozhou	0.370431	0.0801443	0.103166	0.760597	0.685021	0.309544	0.138783	0.0205985	0.192724	0.0812589	0.0605533	0.0461436	0.0478481	0.507496	0.409981	0.186955	0.870933	0.979475	0.0776686	0.696137	0.706941	4
Chizhou	0.0731113	0.0332098	0.0311542	0.689755	0.608931	0.365895	0.049816	0.0509184	0.106329	0.162217	0.257988	0.274021	0.0412658	0.625967	0.518097	0.695856	0.900218	0.776683	0.20833	0.357969	0.421343	2
Xuancheng	0.167344	0.0701763	0.103166	0.693721	0.512898	0.324753	0.0751085	0.0532751	0.130421	0.194955	0.0431892	0.261556	0.128439	0.60205	0.566815	0.690049	0.86017	0.877668	0.396341	0.311135	0.574452	2
Putian	0.22502	0.12212	0.0413687	0.3717	0.938218	0.230069	0.34139	0.0266699	0.335259	0.130536	0.103172	0.0529881	0.089789	0.545551	0.733687	0.893538	0.765016	0.963875	0.171089	0.516742	0.314052	3
Sanming	0.166531	0.125025	0.0607763	0.626308	0.52829	0.21301	0.0357371	0.122996	0.0653074	0.132871	0.199697	0.27984	0.146582	0.672862	0.623655	0.883667	0.910236	0.876026	0.211278	0.616286	0.44594	2
Quanzhou	0.67831	0.498547	0.236466	0.273428	0.661175	0.195877	0.345591	0.128196	0.461784	0.584227	0.307306	0.0593252	0.447848	0.554048	0.792379	0.881977	0.773999	0.973727	0.245474	0.42791	0.459077	3
Zhangzhou	0.374492	0.217391	0.131767	0.53933	0.572296	0.241417	0.259317	0.0242612	0.206926	0.221398	0.282077	0.0875777	0.196287	0.660728	0.676011	0.860117	0.770784	0.950739	0.257946	0.417005	0.372389	3
Nanping	0.181966	0.0902124	0.0587334	0.652903	0.513332	0.166152	0.0383276	0.0620432	0.0857718	0.0971208	0.169989	0.238823	0.0766245	0.605645	0.570155	0.877123	0.91955	0.980296	0.342429	0.503995	0.165711	4
Longyan	0.186028	0.13349	0.0587334	0.47464	0.629092	0.264389	0.0595056	0.0986384	0.0991707	0.146348	0.159821	0.22864	0.0929114	0.609693	0.68323	0.8817	0.91419	0.905583	0.206883	0.603611	0.359775	2
Ningde	0.220146	0.120868	0.0357508	0.48196	0.506395	0.213377	0.112426	0.0399561	0.14195	0.118859	0.0699575	0.192566	0.0839662	0.687234	0.743702	0.891105	0.854586	0.949097	0.212822	0.531577	0.313456	3
Jingdezhen	0.095857	0.0376177	0.026047	0.706553	0.720139	0.287644	0.0791918	0.0873857	0.266127	0.156259	0.446088	0.326846	0.0308861	0.520435	0.580373	0.764394	0.892268	0.866174	0.374137	0.479225	0.505859	3
Pingxiang	0.111292	0.0379183	0.0199183	0.879044	0.820074	0.192056	0.0732992	0.178771	0.117323	0.109041	0.313269	0.367774	0.047173	0.585273	0.438639	0.736772	0.863617	0.848933	0.410464	0.584799	0.344188	3
Xinyu	0.0617384	0.0398217	0.0388151	0.83585	0.400173	0.377547	0.0802211	0.0774844	0.0884682	0.178985	0.649049	0.291736	0.0388186	0.62942	0.505764	0.661149	0.83038	0.791461	0.388082	0.606486	0.398366	3
Yingtan	0.0576767	0.0389201	0.0245148	0.778402	0.661608	0.275354	0.0919204	0.0337998	0.0678095	0.182477	0.1466	0.404796	0.0286076	0.579767	0.498954	0.725611	0.829254	0.953202	0.288818	0.652118	0.448744	3
Ganzhou	0.692933	0.17226	0.217058	0.582802	0.648385	0.23633	0.0405274	0.050339	0.319356	0.179836	0.228178	0.173977	0.192574	0.543615	0.567031	0.837092	0.875015	0.942529	0.185731	0.708428	0.368969	2
Ji'an	0.327376	0.0982769	0.123596	0.623042	0.796228	0.377486	0.0248162	0.0648316	0.137756	0.130089	0.108627	0.238169	0.136034	0.501865	0.416697	0.750686	0.870976	0.940066	0.259608	0.608643	0.445836	3
YichunJX	0.371243	0.129433	0.184883	0.621596	0.722523	0.29335	0.060362	0.029335	0.155932	0.132219	0.1847	0.262452	0.155781	0.506398	0.441724	0.689581	0.85876	0.917898	0.295613	0.740604	0.432933	3
FuzhouJX	0.258327	0.0684733	0.115935	0.636747	0.607631	0.304426	0.0336328	0.0588545	0.138519	0.158351	0.133261	0.29567	0.0736709	0.516597	0.458359	0.781528	0.884988	0.949097	0.304706	0.713138	0.471004	3
Shangrao	0.49147	0.121118	0.126149	0.635783	0.887709	0.347769	0.0445698	0.0161145	0.142023	0.0880153	0.0973888	0.201607	0.157384	0.518667	0.458291	0.749775	0.857661	0.929392	0.259261	0.727996	0.406731	2
Zibo	0.346872	0.173663	0.229316	0.675981	0.37481	0.323925	0.328316	0.0650712	0.188414	0.206855	0.410558	0.182734	0.14557	0.624676	0.627492	0.211126	0.770613	0.855501	0.367914	0.265221	0.503898	3
Zaozhuang	0.277823	0.0764877	0.129724	0.638856	0.382181	0.196361	0.293833	0.041599	0.140673	0.149019	0.163254	0.0129274	0.0581435	0.546489	0.575772	0.105822	0.794713	0.688834	0.301719	0.745148	0.442523	2
Dongying	0.142161	0.139	0.225741	0.812409	0.462606	0.58392	0.276265	0.169664	0.171295	0.294906	0.29005	0.31246	0.0670886	0.81334	0.683629	0.254587	0.495478	0.91133	0.387798	0.366644	0.558141	3
Yantai	0.541024	0.381186	0.41522	0.641322	0.221548	0.317544	0.219021	0.0979345	0.260412	0.199512	0.547514	0.216353	0.180422	0.654686	0.662954	0.533927	0.736314	0.953202	0.518571	0	0.464519	3
Weifang	0.727051	0.283811	0.495403	0.765858	0.337958	0.318861	0.281277	0.0791704	0.262038	0.22732	0.381005	0.0735909	0.292911	0.602276	0.598214	0.269009	0.71039	0.870279	0.298463	0.439629	0.442501	3
Jining	0.643379	0.214787	0.344229	0.638086	0.318014	0.363498	0.269377	0.0623775	0.252001	0.145613	0.239313	0.0670664	0.159578	0.630366	0.555416	0.101029	0.815501	0.889163	0.24971	0.558188	0.620227	3
Tai'an	0.409423	0.128231	0.199183	0.466104	0.358985	0.468082	0.223786	0.0277139	0.163492	0.112166	0.391873	0.0509281	0.0883544	0.543514	0.516725	0.13691	0.789028	0.857964	0.342262	0.341186	0.442243	3
Weihai	0.20065	0.140854	0.189479	0.574642	0.27791	0.565584	0.283106	0.139972	0.271681	0.268118	0.552982	0.221979	0.0863291	0.559847	0.721219	0.707626	0.72256	0.974548	0.623314	0.150517	0.701507	3
Rizhao	0.205524	0.0901623	0.146578	0.596603	0.319749	0.297896	0.23796	0.0460939	0.157723	0.152387	0.195486	0.122366	0.063038	0.634129	0.611922	0.372149	0.752332	0.775041	0.341449	0.415593	0.341595	3
Linyi	0.860276	0.230365	0.434116	0.636924	0.32972	0.403945	0.238951	0.0267945	0.444338	0.106636	0.141941	0.0197466	0.284473	0.589781	0.562324	0.254202	0.781579	0.850575	0.182288	0.605881	0.438601	3
Dezhou	0.419984	0.143909	0.268131	0.609048	0.308259	0.544285	0.188956	0.0356539	0.21429	0.13677	0.207998	0.0777197	0.122025	0.557325	0.388979	0.150056	0.839508	0.882594	0.213377	0.581672	0.479817	3
Liaocheng	0.447604	0.10574	0.225741	0.491871	0.397355	0.117838	0.240402	0.0686403	0.202938	0.113222	0.149578	0.0466645	0.116962	0.584468	0.427202	0.0532684	0.836221	0.781609	0.172713	0.79089	0.376606	3
Binzhou	0.283509	0.115308	0.234423	0.738573	0.389118	0.744444	0.265817	0.0563715	0.168068	0.174827	0.258353	0.194705	0.106835	0.586756	0.509369	0.199461	0.667195	0.552545	0.283267	0.455754	0.677235	3
Heze	0.679123	0.164145	0.267109	0.746167	0.364188	0.20684	0.238217	0.0118927	0.185016	0.081598	0.086964	0.0190133	0.156793	0.513144	0.371199	0.06494	0.848891	0.910509	0.158443	0.773493	0.628282	3
Kaifeng	0.356621	0.108495	0.102656	0.654343	0.446347	0.201173	0.201519	0.0208617	0.246104	0.0577758	0.403495	0.0919397	0.0879325	0.423552	0.534268	0.0504378	0.82735	0.962233	0.128146	0.783137	0.326621	3
Luoyang	0.537774	0.246544	0.199694	0.614893	0.502927	0.235046	0.129617	0.0693509	0.645009	0.144692	0.365706	0.126945	0.146414	0.559663	0.632454	0.310972	0.843282	0.948276	0.138283	0.418076	0.174965	3
Pingdingshan	0.369618	0.112703	0.103677	0.714605	0.38023	0.124987	0.173214	0.0338143	0.164988	0.0633806	0.262122	0.0610365	0.0698734	0.46138	0.46009	0.171352	0.825942	0.889163	0.151424	0.655132	0.258991	3
Anyang	0.409423	0.104889	0.130746	0.720816	0.499241	0.139198	0.240258	0.0364188	0.205364	0.0563072	0.340887	0.0481365	0.061519	0.476263	0.459221	0.0385775	0.804328	0.79803	0.245485	0.598218	0.305464	3
Hebi	0.0917953	0.0388199	0.0383044	0.564708	0.47171	0.387349	0.26567	0.0458279	0.103324	0.0672781	0.2584	0.134674	0.0294515	0.402928	0.488859	0	0.814259	0.881773	0.225932	0.553595	0.313552	3
Xinxiang	0.472786	0.140653	0.201736	0.644933	0.626707	0.127133	0.250683	0.017446	0.152795	0.15474	0.523344	0.03526	0.122278	0.446606	0.527618	0.0654034	0.835383	0.894089	0.2628	0.503133	0.20194	2
Jiaozuo	0.250203	0.0960729	0.12666	0.751023	0.616952	0.2562	0.302621	0.0372349	0.10885	0.127997	0.510519	0.10055	0.0673418	0.455765	0.571454	0.0590071	0.786254	0.898194	0.292293	0.462965	0.36578	3
Puyang	0.270512	0.0723302	0.0955056	0.664318	0.355083	0.195051	0.309688	0.0616124	0.16667	0.0567979	0.12754	0.114333	0.0489451	0.52698	0.450134	0.00564206	0.827999	0.953202	0.090681	0.756226	0.255662	3
Xuchang	0.320065	0.162442	0.108274	0.739547	0.548884	0.232953	0.252036	0.0365202	0.204118	0.1101	0.234044	0.0666059	0.125654	0.477847	0.551022	0.0842632	0.834585	0.960591	0.222392	0.604346	0.531495	3
Luohe	0.156783	0.0685233	0.0582227	0.746932	0.510514	0.308702	0.243215	0.0227995	0.133051	0.110515	0.282674	0.129897	0.0429536	0.450142	0.525788	0.074439	0.873445	0.977011	0.12901	0.56561	0.270743	4
Sanmenxia	0.129976	0.0623623	0.0444331	0.790008	0.405376	0.170469	0.0676048	0.0698262	0.151098	0.05395	0.202272	0.273722	0.0292827	0.499049	0.528369	0.436373	0.856653	0.889163	0.199686	0.622226	0.162296	3
Nanyang	0.753859	0.186335	0.21808	0.519571	0.426837	0.258408	0.0666913	0.0163465	0.308812	0.0703171	0.200567	0.0394894	0.120253	0.426451	0.462305	0.296698	0.86956	0.934319	0.0574081	0.9426	0.200587	4
Shangqiu	0.599513	0.136245	0.187947	0.689288	0.552786	0.18079	0.1808	0.0015301	0.218405	0.0481309	0.279093	0.019579	0.127764	0.421465	0.410353	0.111397	0.855132	0.958128	0.127715	0.891852	0.179012	3
Xinyang	0.471162	0.130184	0.1619	0.647337	0.453935	0.185117	0.0500078	0.0158297	0.266089	0.0498251	0.241185	0.12822	0.10135	0.434262	0.477377	0.404749	0.869124	0.949918	0.0918658	0.866222	0.181966	4
Zhoukou	0.696994	0.153326	0.14811	0.738709	0.615218	0.195959	0.164642	0	0.129736	0.0343837	0.103044	0.0388644	0.115949	0.396978	0.343512	0.124711	0.866916	0.982759	0.0525971	1	0.340657	1
Zhumadian	0.533712	0.132889	0.151685	0.669343	0.521786	0.280145	0.123983	0.0692716	0.194998	0.0424974	0.0813372	0.0922238	0.0940084	0.42201	0.41063	0.223337	0.854072	0.954023	0.0504633	0.913454	0.449615	4
Huangshi	0.164907	0.0718794	0.0699694	0.77675	0.538045	0.263505	0.147747	0.0772792	0.199773	0.149387	0.376041	0.203274	0.0551899	0.530215	0.584301	0.571018	0.796149	0.832512	0.448039	0.507321	0.470985	2
Shiyan	0.221771	0.0856041	0.0643514	0.800241	0.336224	0.213616	0.0208894	0.045629	0.190534	0.117207	0.256652	0.323782	0.0759494	0.588834	0.525334	0.660659	0.932242	0.975369	0.224448	0.507599	0.373525	4
Xiangyang	0.391552	0.220196	0.148621	0.627652	0.545198	0.25777	0.0499454	0.0503567	0.395375	0.123324	0.135468	0.251174	0.138987	0.572334	0.548964	0.436104	0.881522	0.978654	0.310617	0.265296	0.234372	4
Ezhou	0.0519903	0.040022	0.0255363	0.837582	0.566659	0.240262	0.332629	0.134132	0.14282	0.108766	0.246722	0.211775	0.0372996	0.601832	0.643508	0.48361	0.714545	0.839901	0.389508	0.457051	0.326004	3
Jingmen	0.170593	0.0851533	0.0837589	0.871731	0.544765	0.164479	0.0399626	0.0291944	0.113795	0.124494	0.11373	0.233571	0.0786498	0.611771	0.469581	0.416082	0.845566	0.908867	0.397632	0.206436	0.344691	2
Xiaogan	0.300569	0.0995792	0.110317	0.809654	0.480815	0.131733	0.100326	0.0403676	0.178837	0.0940571	0.141765	0.14828	0.0948523	0.516563	0.486594	0.471911	0.815286	0.944171	0.237663	0.250625	0.42661	4
Jingzhou	0.383428	0.108345	0.138917	0.759095	0.546933	0.119373	0.0672564	0.016492	0.347172	0.0948172	0.299558	0.150523	0.100338	0.431731	0.501413	0.444965	0.75815	0.965517	0.343226	0.135692	0.363179	4
Huanggang	0.434606	0.0983771	0.160878	0.819938	0.654238	0.1438	0.0600923	0.0715678	0.235377	0.0746835	0.136972	0.148345	0.102447	0.482959	0.469116	0.59141	0.830544	0.954844	0.214927	0.391617	0.268857	4
Xianning	0.181966	0.0660689	0.0699694	0.876579	0.579449	0.223132	0.0604046	0.0469135	0.148968	0.125093	0.195434	0.205726	0.0755274	0.565797	0.519033	0.649672	0.864693	0.903941	0.214348	0.508314	0.904166	3
Suizhou	0.127539	0.0446303	0.0398366	0.769651	0.454151	0.131145	0.0298018	0.0165058	0.151155	0.0757878	0.0631422	0.116103	0.0548523	0.51058	0.454055	0.455459	0.858739	0.985222	0.201757	0.313538	0.2501	1
Zhuzhou	0.281072	0.145261	0.110317	0.806132	0.665727	0.0983411	0.0615195	0.0951437	0.171702	0.17342	0.372458	0.222163	0.145992	0.624509	0.540222	0.707727	0.866323	0.972906	0.400315	0.378277	0.333464	4
Xiangtan	0.186028	0.107043	0.0801839	0.776496	0.506178	0.105696	0.117409	0.0593227	0.0962848	0.0470762	0.932561	0.168068	0.098481	0.510002	0.514365	0.570872	0.829908	0.884236	0.343526	0.280431	0.235797	3
Hengyang	0.503656	0.165448	0.170072	0.764439	0.526122	0.201923	0.0504351	0.0313978	0.210982	0.0524913	0.345095	0.0827152	0.103544	0.503013	0.398567	0.613598	0.830478	0.957307	0.255798	0.556135	0.236441	4
Shaoyang	0.497157	0.102434	0.116445	0.82515	0.621288	0.179353	0.0261502	0.035417	0.125106	0.0608403	0.107659	0.0952063	0.153671	0.492512	0.279203	0.718612	0.89745	0.954844	0.0465482	0.552769	0.2994	4
Yueyang	0.374492	0.190142	0.139939	0.697099	0.480598	0.129547	0.0614782	0.0308735	0.19198	0.0750461	0.168608	0.168779	0.138397	0.48466	0.418377	0.581005	0.825314	0.961412	0.275911	0.389777	0.377755	4
Changde	0.393176	0.17752	0.147089	0.728579	0.564708	0.128554	0.0510137	0.0358797	0.183431	0.0671601	0.191998	0.204764	0.125907	0.532385	0.403898	0.524495	0.837269	0.963875	0.343506	0.281125	0.435838	4
Zhangjiajie	0.0877335	0.0175316	0.130235	0.678272	0.18101	0.0607233	0.0443746	0.0195817	0.303054	0.0431574	0.18008	0.262752	0.0145992	0.581334	0.393526	0.711023	0.741535	0.792282	0.17991	0.410578	0.30498	4
Yiyang	0.277011	0.0824985	0.0750766	0.766697	0.492521	0.194888	0.0372544	0.0175845	0.0940291	0.0889176	0.200497	0.137201	0.104641	0.521885	0.323101	0.561269	0.858871	0.954023	0.215581	0.396356	0.481039	4
Chenzhou	0.344435	0.115057	0.102656	0.764907	0.434858	0.169653	0.0306813	0.0291443	0.264568	0.0587223	0.122979	0.133798	0.095865	0.535603	0.373049	0.789231	0.890666	0.955665	0.1362	0.717795	0.303162	4
Yongzhou	0.394801	0.0952715	0.110317	0.758212	0.542814	0.0986641	0.0312838	0.0858661	0.134595	0.0525351	0.138198	0.114356	0.096962	0.472852	0.345505	0.72319	0.884657	0.954844	0.142937	0.716451	0.324288	4
Huaihua	0.336312	0.0734322	0.0868233	0.824722	0.444396	0.0413134	0.0171446	0.0530209	0.133593	0.0564058	0.134556	0.158514	0.0592405	0.551743	0.348532	0.748102	0.927249	0.98358	0.163302	0.553728	0.12949	4
Loudi	0.275386	0.0738329	0.0633299	0.772166	0.585519	0.0195879	0.0596414	0.0258502	0.0800616	0.0611287	0.183821	0.0788109	0.0818565	0.496074	0.350876	0.647036	0.860065	0.753695	0.265727	0.556338	0.356018	3
Shaoguan	0.196588	0.0574534	0.0914198	0.905384	0.398439	0.254043	0.0565839	1	0.151041	0.146384	0.19031	0.2947	0.0383122	0.738714	0.490615	0.825084	0.925716	0.786535	0.325591	0.493806	0.162831	3
Zhuhai	0.163282	0.164095	0.149132	0.178877	0.151962	0.435985	0.690235	0.123788	0.396067	0.915665	0.877676	0.872239	0.121688	0.813449	0.904964	0.878946	0.430881	0.97619	0.827515	0.253217	0.318268	3
Shantou	0.411048	0.126478	0.144535	0.573484	0.108606	0.0982809	0.713846	0.053145	0.272299	0.366247	0.104701	0.0440253	0.158481	0.621676	0.628769	0.865472	0.568248	0.949918	0.133189	0.413254	0.171408	3
Foshan	0.737612	0.531457	0.521961	0.476686	0.27119	0.338542	0.75139	0.0773841	0.305855	0.712306	0.13882	0.159278	0.672574	0.706618	0.842117	0.801728	0.548511	0.980296	0.474268	0.310733	0.337143	3
Jiangmen	0.354184	0.15002	0.237998	0.753046	0.259918	0.365945	0.268446	0.0931369	0.18345	0.322739	0.170221	0.104312	0.209705	0.65368	0.624484	0.860315	0.788751	0.949097	0.417059	0.396941	0.37046	3
Zhanjiang	0.531275	0.144961	0.14811	0.692278	0.403425	0.196047	0.184124	0.0241858	0.336825	0.0713088	0.283099	0.0418502	0.0616034	0.735881	0.45039	0.852002	0.731109	0.891626	0.168457	0.706446	0.187625	3
Maoming	0.466288	0.153927	0.081716	0.765469	0.655972	0.30414	0.138598	0.0157425	0.161855	0.0526033	0.13548	0.0311989	0.0591561	0.639995	0.371342	0.842824	0.850732	0.984401	0.141416	0.877758	0.254608	4
Zhaoqing	0.298944	0.10544	0.134321	0.799489	0.292868	0.372591	0.105656	0.0843446	0.209605	0.140517	0.442072	0.155735	0.103882	0.668622	0.489734	0.796885	0.909102	0.895731	0.234574	0.586531	0.35838	2
Huizhou	0.456539	0.201112	0.282431	0.629238	0.227184	0.258329	0.298396	0.0362264	0.486419	0.288374	0.132328	0.158511	0.253586	0.667264	0.756656	0.854216	0.846052	0.94335	0.38996	0.638984	0.254049	3
Meizhou	0.278635	0.0501903	0.087334	0.825049	0.42662	0.334031	0.0786038	0.112329	0.135491	0.0961703	0.105237	0.230945	0.0383966	0.628045	0.441559	0.850137	0.881406	0.83908	0.331063	0.699298	0.298598	2
Shanwei	0.181154	0.0459828	0.0439224	0.789421	0.192499	0.210615	0.30288	0.0328521	0.0982253	0.0913965	0.0608955	0.136181	0.0175527	0.631967	0.478976	0.8903	0.727966	0.90312	0.120223	0.825098	0.267303	3
Heyuan	0.194963	0.0449309	0.0587334	0.807328	0.473878	0.242447	0.0596066	0.03671	0.118405	0.132021	0.0512474	0.250968	0.0448101	0.639224	0.479631	0.852564	0.898481	0.949097	0.221172	0.787681	0.375229	4
Yangjiang	0.176279	0.057804	0.0771195	0.838809	0.511814	0.55682	0.123908	0.0531417	0.147684	0.177564	0.0578198	0.119146	0.028692	0.645241	0.512507	0.873136	0.87171	0.855501	0.184921	0.750156	0.551212	3
Qingyuan	0.286759	0.0786916	0.114402	0.805194	0.342077	0.202839	0.0863186	0.0685701	0.141014	0.106855	0.0504978	0.152521	0.0661603	0.692765	0.51502	0.804648	0.916825	0.795567	0.26265	0.690429	0.377124	2
Dongguan	0.815597	0.473051	0.3238	0	0.0875786	0.416845	1	0.118656	0.45869	0.650802	0.178069	0.0544354	0.968354	0.58146	0.840578	0.812693	0.52164	0.963875	0.761288	0.384071	0.258105	3
Zhongshan	0.324127	0.147566	0.254852	0.58009	0.206157	0.0913559	0.858169	0.132584	0.160386	0.822705	0.0910074	0.0736264	0.322194	0.713096	0.840199	0.869718	0.491733	0.955665	0.591675	0.360028	0.128502	3
Chaozhou	0.17303	0.0446303	0.0796731	0.803839	0.158032	0.161314	0.305667	0.344225	0.16454	0.36804	0.15417	0.0724102	0.0750211	0.613606	0.598869	0.834184	0.758875	0.889984	0.122211	0.432292	0.127326	3
Jieyang	0.417547	0.0949709	0.125638	0.730337	0	0.200968	0.360742	0.0194692	0.209582	0.149708	0.0299869	0	0.113671	0.500524	0.524819	0.84499	0.7822	0.950739	0.112238	0.69057	0.50337	3
Yunfu	0.157595	0.0398718	0.0485189	0.842436	0.430739	0.305346	0.103357	0.0582178	0.0852743	0.0733786	0.0803869	0.180861	0.0281013	0.642183	0.406648	0.833966	0.901747	0.848933	0.171564	0.846667	0.0966624	2
Liuzhou	0.302193	0.148818	0.134321	0.70003	0.359636	0.129799	0.0611806	0.0466953	0.278365	0.129731	0.337112	0.190584	0.084557	0.636383	0.581605	0.770004	0.904921	0.926108	0.361459	0.447038	0.352621	3
Wuzhou	0.193339	0.0438289	0.0500511	0.844194	0.463256	0.197924	0.0426078	0.0353848	0.103372	0.0414192	0.107588	0.146489	0.0387342	0.549908	0.365563	0.774426	0.897602	0.970443	0.192108	0.906114	0.424524	1
Beihai	0.114541	0.0536466	0.061287	0.8065	0.474312	0.121446	0.169752	0.0372752	0.447539	0.0367034	0.373051	0.199594	0.0193249	0.58591	0.544911	0.776001	0.727726	0.945813	0.21841	0.602229	0.398244	3
Fangchenggang	0.0495532	0.0263975	0.0342186	0.865463	0.41383	0.529283	0.0858022	0.103182	0.152927	0.0296448	0.0216487	0.33588	0.00852321	0.654392	0.53398	0.805756	0.870257	0.715928	0.161768	0.818382	0.581924	3
Qinzhou	0.233144	0.0592066	0.0561798	0.882452	0.389985	0.112778	0.0599315	0.0146039	0.0999265	0.0264372	0.158142	0.0209644	0.0243038	0.533031	0.277497	0.766712	0.868766	0.91954	0.0841232	0.890735	0.627425	3
Guigang	0.315191	0.0574534	0.0551583	0.840182	0.690874	0.123953	0.0726286	0.0706381	0.0810236	0.0459678	0	0.0163708	0.0693671	0.567926	0.284009	0.728008	0.849763	0.835796	0.0785635	0.772384	0.522041	2
YulinGX	0.435418	0.0778902	0.0883555	0.835553	0.417516	0.159542	0.0688193	0.027828	0.0976543	0.0418298	0.0563381	0.024372	0.0491983	0.551945	0.297857	0.778419	0.88359	0.940066	0.10624	0.834363	0.24178	2
Baise	0.255077	0.0565017	0.0628192	0.884398	0.565576	0.126107	0.0180867	0.0563478	0.0765596	0.030356	0.33132	0.307653	0.0275949	0.638118	0.258696	0.802869	0.927487	0.765189	0.124843	0.645417	0.438527	3
Hezhou	0.127539	0.0274494	0.0199183	0.814077	0.648385	0.251348	0.0283715	0.0360854	0.0834948	0.0423771	0.13885	0.195413	0.0185654	0.642275	0.360986	0.780488	0.898472	0.914614	0.130161	0.849586	0.567459	3
Hechi	0.24208	0.0361651	0.0311542	0.892396	0.616952	0.0750796	0.0092584	0.0314377	0.0627603	0.0210567	0.121669	0.270857	0.0179747	0.629151	0.197974	0.80174	0.933883	0.962233	0.12902	0.898508	0.360819	2
Laibin	0.133225	0.0250451	0.0311542	0.873634	0.59289	0.0973044	0.0330147	0.058449	0	0.0301117	0.144498	0.164747	0.0183122	0.55616	0.280773	0.736368	0.897501	0.896552	0.13361	0.618108	0.398938	3
Chongzuo	0.134037	0.0302044	0.0474974	0.854996	0.634078	0.399619	0.0293182	0.043262	0.047954	0.0334815	0.641996	0.270102	0.0260759	0.569627	0.325153	0.7793	0.884631	0.866174	0.139743	0.572773	0.40739	2
Luzhou	0.310317	0.0977259	0.0623085	0.812288	0.457186	0.167574	0.0439464	0.0416091	0.21039	0.0549902	0.239081	0.160466	0.0620253	0.490241	0.332224	0.635498	0.885296	0.972085	0.36432	0.302047	0.178608	3
Deyang	0.245329	0.110098	0.110317	0.837009	0.464123	0.205356	0.137326	0.0288335	0.116553	0.126668	0.537073	0.0930621	0.101772	0.655507	0.425586	0.563916	0.807141	0.987685	0.302469	0.257343	0.452996	4
Mianyang	0.35987	0.140453	0.109295	0.729206	0.473878	0.168325	0.0393911	0.0389338	0.214212	0.143506	0.519594	0.100782	0.0891139	0.620185	0.467205	0.707665	0.884657	0.978654	0.406679	0.274176	0.286137	4
Guangyuan	0.151909	0.0401723	0.0234934	0.775559	0.52829	0.239337	0.019616	0.0640485	0.0965217	0.03565	0.120407	0.242476	0.0416034	0.583739	0.276846	0.731361	0.907475	0.941708	0.353256	0.642142	0.25528	2
Suining	0.193339	0.0599579	0.0449438	0.737339	0.497941	0.217878	0.0980673	0.0265039	0.11955	0.0695334	0.0691877	0.117521	0.0459916	0.491482	0.282784	0.604541	0.82207	1	1	0.247264	0.431398	1
Neijiang	0.219334	0.0631136	0.026047	0.806182	0.399957	0.268133	0.0864622	0.0215207	0.103687	0.0598468	0.201592	0.0872855	0.0307173	0.480663	0.302601	0.536946	0.811407	0.891626	0.142176	0.242616	0.232022	3
Leshan	0.220959	0.090012	0.0623085	0.851222	0.513549	0.306449	0.0436134	0.0258187	0.121291	0.0583598	0.256765	0.139852	0.04827	0.649021	0.407129	0.678296	0.910372	0.885878	0.245443	0.211676	0.2475	2
Nanchong	0.419984	0.109948	0.0914198	0.839206	0.451767	0.168053	0.0708891	0.0337406	0.180026	0.0433467	0.274629	0.146582	0.0637975	0.610053	0.310532	0.596564	0.84322	0.999179	0.309467	0.45151	0.213757	1
Meishan	0.204712	0.0610098	0.0658836	0.838159	0.623889	0.194879	0.0868166	0.00359302	0.0983888	0.0612533	0.229317	0.108172	0.0530802	0.602368	0.38452	0.597642	0.809778	0.965517	0.209978	0.311807	0.275055	4
Yibin	0.337124	0.130034	0.0745659	0.784708	0.457837	0.186777	0.0532092	0.020915	0.222632	0.079579	0.125253	0.225232	0.0690295	0.646012	0.358167	0.572733	0.874991	0.963054	0.307196	0.527834	0.178383	3
Ya'an	0.0804224	0.0274995	0.0107252	0.811643	0.539129	0.26739	0.0169128	0.0717925	0.0915484	0.0607478	0.721719	0.214435	0.0253165	0.56775	0.318439	0.851726	0.953202	0.962233	0.467417	0.447055	0.786504	4
Bazhong	0.184403	0.0281006	0.011236	0.860814	0.469759	0.148877	0.0163606	0.0523897	0.0967184	0.0352237	0.0315711	0.197874	0.0228692	0.529905	0.184874	0.712314	0.922897	0.958128	0.120982	0.793979	0.274962	4
Ziyang	0.151909	0.0301543	0.0214505	0.796324	0.526555	0.216347	0.0523915	0.0661136	0.0828954	0.0314345	0.0750326	0.0870738	0.0168776	0.569761	0.247635	0.593736	0.820346	0.987685	0.293059	0.185041	0.413757	1
Liupanshui	0.210398	0.0568022	0.0459653	0.906028	0.370258	0.101125	0.0549407	0.0177277	0.111482	0.0570666	0.113989	0.165796	0.0227848	0.660233	0.311137	0.838742	0.903566	0.612479	0.13966	0.648436	0.47449	3
Zunyi	0.501219	0.176017	0.145557	0.893929	0.429005	0.143094	0.0394982	0.0278193	0.202369	0.0847954	0.206	0.197032	0.0580591	0	0.369222	0.798272	0.925605	0.93514	0.209693	0.540859	0.424244	4
Anshun	0.164907	0.0381186	0.040858	0.889816	0.471277	0.641036	0.0600333	0.0203059	0.117766	0.062949	0.148653	0.219505	0.025654	0.608226	0.321194	0.815999	0.880697	0.897373	0.134907	0.715532	0.627154	4
Bijie	0.524777	0.0908636	0.0597549	0.910766	0.311945	0.208407	0.0254028	0.00994829	0.0948063	0.0229059	0.098877	0.171677	0.0284388	0.655549	0.153489	0.837791	0.903768	0.776683	0.0737644	0.839508	0.213648	4
Tongren	0.232331	0.0562012	0.0444331	0.894931	0.536527	0.155566	0.0308803	0.0573371	0.085298	0.0605379	0.229704	0.299336	0.0302954	0.46143	0.283881	0.802598	0.909743	0.926929	0.814382	0.94797	0.335229	4
Qujing	0.432981	0.137898	0.0806946	0.83736	0.393453	0.154697	0.0411123	0.0175094	0.110923	0.0317328	0.0873813	0.104648	0.0508861	0.660661	0.305578	0.883463	0.865533	0.871921	0.0797599	0.68809	0.334165	3
Yuxi	0.147035	0.092767	0.0296221	0.773287	0.734663	0.376137	0.0507567	0.0650948	0.21197	0.0835291	0.122776	0.278663	0.0318987	0.736812	0.410724	0.848014	0.859609	0.908867	0.184575	0.511747	0.462184	2
Zhaotong	0.377742	0.0542476	0.0224719	0.860989	0.299371	0.11762	0.022088	0.00942672	0.0899941	0.0108303	0.0426117	0.232601	0.00801688	0.710062	0.156736	0.839683	0.911702	0.904762	0.0517703	0.738436	0.295923	4
Lijiang	0.0666125	0.0153777	0.00561798	0.802732	0.441145	0.308041	0.0139021	0.0569929	0.364172	0.0313947	0.31095	0.300883	0	0.757703	0.394788	1	0.863792	0.949918	0.132331	0.677735	0.318605	4
Pu'er	0.160032	0.0370166	0.0143003	0.771945	0.187947	0.100585	0.00389304	0.0409772	0.0213766	0.0170327	0.0495181	0.279592	0.00978903	0.715702	0.231287	0.824939	0.949992	0.933498	0.134148	0.546186	0.30064	2
Lincang	0.147847	0.0308054	0.00868233	0.797112	0.348147	0	0.0109538	0.0140826	0.0526265	0.0130366	0.054062	0.230697	0.0107173	0.750354	0.166018	0.843711	0.93828	0.950739	0.0785259	0.675864	0.19502	4
Tongchuan	0.0219334	0.00881587	0	0.837974	0.418166	0.113986	0.0690083	0.102638	0.0554816	0.0252085	0.112944	0.493248	0.0123207	0.493627	0.41166	0.481747	0.874857	0.665846	0.389609	0.344349	0.171858	2
Baoji	0.233956	0.103737	0.087334	0.824098	0.371992	0.171698	0.0410438	0.0536688	0.171356	0.0655382	0.182865	0.177303	0.0670042	0.526377	0.442366	0.611205	0.906991	0.937603	0.307119	0.315634	0.209544	2
Xianyang	0.285946	0.10013	0.153218	0.568152	0.482333	0.226916	0.139541	0.0528197	0.341708	0.101187	0.635647	0.154042	0.056962	0.495051	0.475783	0.361532	0.769123	0.924466	0.272549	0.399617	0	2
Weinan	0.345248	0.0831497	0.128192	0.770338	0.564925	0.194879	0.0888884	0.0321016	0.0960716	0.0157373	0.109388	0.150087	0.0443038	0.464095	0.352385	0.264473	0.74481	0.769294	0.181949	0.441051	0.129189	3
Yan'an	0.149472	0.0698758	0.0434116	0.785082	0.195101	0.100115	0.0537179	0.0692723	0.25524	0.0407196	0.127669	0.554838	0.0190717	0.583119	0.390653	0.586069	0.795062	0.95977	0.234333	0.736667	0.293855	3
Hanzhong	0.22502	0.0694751	0.0653728	0.785658	0.45762	0.214727	0.0192224	0.0277844	0.265952	0.0428179	0.216572	0.202308	0.0572152	0.52879	0.399828	0.735344	0.954001	0.944171	0.222364	0.48634	0.18744	2
YulinSX	0.259139	0.19455	0.173136	0.702762	0.195751	0.238773	0.0878869	0.0494523	0.142656	0.0471652	0.132459	0.526368	0.081097	0.655708	0.421815	0.560638	0.496253	0.739737	0.137473	0.574018	0.405366	3
Ankang	0.166531	0.0442296	0.0173647	0.780426	0.447431	0.101325	0.0105665	0.103838	0.0291766	0.0287172	0.13516	0.376195	0.0602532	0.486344	0.34837	0.723502	0.966226	0.99179	0.0860878	0.477712	0.224382	4
Shangluo	0.130788	0.0266981	0.0199183	0.684413	0.449816	0.200127	0.00861658	0.0356715	0.0565786	0.0204772	0.150309	0.309033	0.0203376	0.426619	0.253818	0.667156	0.953887	0.939245	0.134464	0.450406	0.13281	4
Jinchang	0	0.0076137	0.0117467	0.905582	0.307175	0.648382	0.0251309	0.158525	0.0288757	0.169624	0.135612	0.297489	0.00438819	0.636719	0.456418	0.684215	0.237343	0.724138	0.269402	0.361821	1	3
Baiyin	0.0869212	0.0145762	0.0342186	0.810807	0.216562	0.111792	0.0154847	0.24332	0.140339	0.0568923	0.0409797	0.276993	0.0100422	0.549146	0.330153	0.61844	0.347628	0.638752	0.107655	0.984479	0.471139	3
Tianshui	0.206336	0.0230916	0.03524	0.511402	0.192933	0.151555	0.0272363	0.0254793	0.122239	0.0289314	0.215594	0.21231	0.00953586	0.488431	0.193398	0.787399	0.806631	0.903941	0.0738444	0.777515	0.234515	4
Wuwei	0.0828595	0.0160289	0.0388151	0.732379	0.246911	0.0991102	0.00791142	0.056941	0.00826205	0.00373839	0.214943	0.339594	0.0113924	0.54778	0.243668	0.646155	0.250871	0.920361	0.195095	0.840499	0.274648	4
Zhangye	0.056052	0.0130735	0.0367722	0.958128	0.332972	0.454075	0.00536571	0.0589361	0.13541	0.177667	0.327445	0.382314	0.011308	0.633232	0.391923	0.779431	0.317765	0.906404	0.122881	0.618908	0.297874	3
Pingliang	0.113729	0.0135243	0.014811	0.800595	0.208324	0.230657	0.0292013	0.0550588	0.0728942	0.00240537	0.159571	0.269458	0.0028692	0.636995	0.220679	0.683695	0.800104	0.560755	0.125676	0.953853	0.369042	3
Jiuquan	0.0503656	0.0226408	0.0653728	0.829497	0.379363	0.280145	0.000177228	0.0930666	0.0859685	0.00197297	0.147431	0.331169	0.015443	0.591105	0.56689	0.613395	0.00526343	0.902299	0.219674	0.455999	0.317434	4
Qingyang	0.141348	0.0274995	0.0153218	0.704852	0.238023	0.154117	0.0589496	0.0326534	0.0938491	0.0426544	0.155973	0.295292	0.00388186	0.589169	0.231156	0.638466	0.673209	0.954844	0.0108213	0.899995	0.542188	1
Dingxi	0.168968	0.0117712	0.0306435	0.773225	0.164318	0.367845	0.0176247	0.0276517	0.0602132	0.0292438	0	0.197681	0.0057384	0.545324	0.172942	0.74403	0.710195	0.875205	0.013111	0.618182	0.19852	4
Longnan	0.15922	0.0123222	0.00970378	0.638659	0.249729	0.0644083	0.00850394	0.0431978	0.0716692	0.0149623	0.0610374	0.301741	0.0021097	0.493996	0.156748	0.848815	0.903857	0.883415	0	0.851868	0.139457	4
Haidong	0.074736	0.0154278	0.0117467	0.77882	0.238023	0.109352	0.0369659	0.032412	0.0410212	0.0204677	0	0.152574	0.00312236	0.518667	0	0.715552	0.665779	0.79803	0.0616437	0.695693	0.46379	2
Yinchuan	0.196588	0.0880585	0.157303	0.830034	0.326685	0.240092	0.240721	0.0805492	0.326298	0.206323	0.843036	0.204452	0.0265823	0.79978	0.621155	0.493856	0.387917	0.458949	0.479223	0.199831	0.268823	3
Shizuishan	0.0251828	0.0168303	0.0704801	1	0.280512	0.653305	0.106111	0.107498	0.0123137	0.128197	0.290033	0.39431	0.022616	0.68203	0.320007	0.477786	0.393942	0.460591	0.54787	0.380743	0.720493	3
Wuzhong	0.0763607	0.0208375	0.0643514	0.915948	0.26512	0.473929	0.0514155	0.131107	0.0221016	0.078546	0.0967722	0.422933	0.0243882	0.753807	0.206731	0.574189	0.336512	0.529557	0.237643	0.657613	0.396996	3
Guyuan	0.0568643	0.00731316	0.0137896	0.943324	0.153696	0.815462	0.0287414	0.0886255	0.017325	0.0317746	0.105237	0.647002	0.000843882	0.836712	0.0742241	0.719064	0.701341	0.875205	0.0813061	0.963104	0.545331	3
Zhongwei	0.0511779	0.0117211	0.0188968	0.956076	0.234988	0.519806	0.0350903	0.0731097	0.0508968	0.0634238	0	0.427575	0.00911392	0.76952	0.177429	0.581376	0.347311	0.543514	0.212891	0.616276	0.602353	2
Karamay	0.0016247	0.0341114	0.0449438	0.974034	0.326469	0.157114	0.137381	0.47246	0.0934297	0.153438	0.497588	0.732502	0.00396624	1	0.659167	0.545977	0.131933	0.883415	0.940858	0.512422	0.652183	3
Kumul	0.018684	0.0201362	0.0209397	0.962083	0.309343	0.328189	0.00115944	0.024219	0.00791849	0.0492329	0.117331	0.537217	0.00827004	0.687586	0.486792	0.61355	0	0.161741	0.36342	0.743548	0.400649	3
